# Supplementary material
Source: publisher site journal article supplement (https://www.spandidos-publications.com/1327/downloadSupplementary)
Supplement: Supplementary file 2 [file downloadSupplementary]

## Sheet: Sheet1
Table SII. Differentially expressed long non-coding RNAs.
Gene name	NEC	CTL	Fold change	log2FC	P-value
NONHSAT155609.1	31.3409	0.01	3134.09	11,6138313236017	1.42868e-23
ENST00000602813	30.037	0.01	3003.7	11,5525243813422	1.29596e-09
NONHSAT059749.2	19.2883	0.01	1928.83	10,9135107146364	3.0582e-22
NONHSAT118562.2	16.2751	0.01	1627.51	10,6684524141107	2.80679e-19
ENST00000620266	25.3832	0.0162496	1562.08	10,6092565687404	2.8427e-30
NONHSAT209475.1	14.7834	0.01	1478.34	10,5297598934809	1.54353e-17
NONHSAT159678.1	13.9578	0.01	1395.78	10,446857584408	2.77702e-17
NONHSAT169788.1	12.6251	0.01	1262.51	10,3020737722739	8.73652e-11
NONHSAT123206.2	11.8384	0.01	1183.84	10,2092589756859	2.57184e-10
NONHSAT094312.2	14.5778	0.0133855	1089.07	10,0888809401653	2.95164e-27
NONHSAT009758.2	8.42354	0.01	842.354	9,71828259180294	1.25184e-14
ENST00000499624	2.40777	0.0029332	820.867	9,68100492507757	6.54436e-25
NONHSAT177823.1	7.66965	0.01	766.965	9,58301622659915	1.05526e-16
NONHSAT159417.1	24.5305	0.0353425	694.079	9,43895590880173	1.51155e-23
NONHSAT173659.1	6.42946	0.01	642.946	9,32855280203511	1.54353e-17
NONHSAT137151.2	6.05997	0.01	605.997	9,24316573443215	2.22019e-08
NONHSAT206983.1	64.4107	0.107387	599.801	9,22833937540931	2.25753e-22
NONHSAT178474.1	5.43581	0.01	543.581	9,08635251547239	1.07922e-10
ENST00000628476	5.27681	0.01	527.681	9,04352096341055	4.69597e-11
NONHSAT081637.2	5.20398	0.01	520.398	9,02347257139762	1.02195e-05
NONHSAT076868.2	98.9415	0.194292	509.241	8,99220343010127	1.31152e-32
NONHSAT155904.1	4.90093	0.01	490.093	8,93691119874108	7.84535e-14
NONHSAT180405.1	4.79396	0.01	479.396	8,90507266031557	3.2072e-07
NONHSAT071404.2	7.36127	0.0156702	469.763	8,8757879459556	2.04311e-20
NONHSAT183239.1	4.67828	0.01	467.828	8,86983312114894	3.85245e-15
NONHSAT083185.2	9.47788	0.0204591	463.261	8,85568121472238	2.59528e-20
NONHSAT055522.2	4.56733	0.01	456.733	8,83520726442401	2.65593e-13
ENST00000573951	4.40788	0.01	440.788	8,78394133001033	3.14262e-16
NONHSAT142596.2	14.2917	0.033687	424.249	8,72876851667428	1.32304e-19
NONHSAT055581.2	4.23446	0.01	423.446	8,72603449537944	2.06257e-10
NONHSAT050230.2	4.23033	0.01	423.033	8,72462532521001	8.73652e-11
NONHSAT056662.2	4.07412	0.01	407.412	8,67034410345408	2.251e-16
ENST00000505532	3.84554	0.01	384.554	8,58704266038943	1.6425e-14
NONHSAT009555.2	3.82085	0.01	382.085	8,57774799787568	3.39013e-06
ENST00000635687	3.59107	0.01	359.107	8,48827116830233	1.12585e-18
ENST00000523099	3.50111	0.01	350.111	8,45166719951719	2.37815e-06
NONHSAT050198.2	3.40149	0.01	340.149	8,41002314637079	1.49728e-05
NONHSAT064287.2	3.39137	0.01	339.137	8,40572344672833	7.02592e-06
ENST00000558776	3.34001	0.01	334.001	8,3837105838901	0.00487477
NONHSAT010340.2	3.3328	0.01	333.28	8,38059124204592	3.28845e-05
ENST00000441790	3.32967	0.01	332.967	8,3792333970839	1.26463e-07
ENST00000426699	3.3125	0.01	331.25	8,37177611480499	7.02592e-06
ENST00000614899	3.28511	0.01	328.511	8,3597969176195	1.26463e-07
NONHSAT182506.1	3.25565	0.01	325.565	8,3468038416728	8.05439e-10
ENST00000615722	3.24657	0.01	324.657	8,34277339940675	1.71629e-07
NONHSAT215498.1	3.22069	0.01	322.069	8,33122523931243	7.53517e-09
NONHSAT095885.2	3.21476	0.01	321.476	8,32856902969764	8.51511e-07
NONHSAT175395.1	3.19569	0.01	319.569	8,31998397013163	1.36535e-12
NONHSAT108374.2	3.18373	0.01	318.373	8,31457544145407	2.85986e-14
NONHSAT207205.1	3.16342	0.01	316.342	8,30534355273599	9.36156e-08
NONHSAT135230.2	3.09431	0.01	309.431	8,27347389142096	0.000272943
NONHSAT157645.1	3.07244	0.01	307.244	8,26324171985615	7.46224e-05
NONHSAT170670.1	2.99762	0.01	299.762	8,22767509940032	1.6852e-08
NONHSAT053816.2	2.9759	0.01	297.59	8,21718202946891	2.29324e-12
ENST00000444977	2.95704	0.01	295.704	8,20801222503236	0.00292486
NONHSAT119063.2	2.89707	0.01	289.707	8,17844848789449	5.19884e-08
NONHSAT086660.2	2.8885	0.01	288.85	8,17417805051626	5.19884e-08
NONHSAT180418.1	2.85754	0.01	285.754	8,15863058476356	7.02592e-06
NONHSAT223075.1	2.78507	0.01	278.507	8,12157234161728	6.96116e-08
NONHSAT175506.1	2.78449	0.01	278.449	8,12127005725963	7.02592e-06
NONHSAT044063.2	2.77297	0.01	277.297	8,11528850881914	1.71629e-07
NONHSAT079464.2	2.76406	0.01	276.406	8,11064763334695	2.11265e-11
NONHSAT149679.1	2.76252	0.01	276.252	8,10983860910646	0.000428911
NONHSAT171426.1	2.74755	0.01	274.755	8,10200059710587	6.96116e-08
ENST00000589360	2.73113	0.01	273.113	8,09335256800361	3.28845e-05
ENST00000594472	2.72076	0.01	272.076	8,08786820927086	1.6852e-08
NONHSAT186057.1	2.71556	0.01	271.556	8,08510550332276	1.71629e-07
ENST00000604099	2.64384	0.01	264.384	8,04648966458575	0.00292486
ENST00000558686	2.61296	0.01	261.296	8,02954264792157	4.93267e-05
ENST00000519751	2.58907	0.01	258.907	8,016291104844	3.28845e-05
NONHSAT188790.1	2.54285	0.01	254.285	7,99030096087143	2.22019e-08
ENST00000536539	2.53788	0.01	253.788	7,98747833714386	0.000272943
NONHSAT212936.1	2.49594	0.01	249.594	7,96343792819636	3.13717e-11
NONHSAT072069.2	2.47037	0.01	247.037	7,94858569324399	3.39013e-06
NONHSAT076793.2	2.46445	0.01	246.445	7,94512277302123	6.74875e-12
NONHSAT221025.1	2.42668	0.01	242.668	7,92284170204342	8.73652e-11
ENST00000632586	2.39106	0.01	239.106	7,901505114034	0.000272943
ENST00000550498	2.37633	0.01	237.633	7,89259038922626	0.000272943
NONHSAT146839.2	2.3575	0.01	235.75	7,88111494123782	2.34039e-07
ENST00000559068	2.35227	0.01	235.227	7,87790762068807	0.00487477
NONHSAT136843.2	2.34512	0.01	234.512	7,87351585157092	3.28845e-05
ENST00000623580	2.33795	0.01	233.795	7,86910156147058	7.46224e-05
ENST00000432395	2.27362	0.01	227.362	7,8288465052329	0.000272943
NONHSAT135231.2	2.24096	0.01	224.096	7,80797407018385	2.21027e-05
NONHSAT087855.2	2.21847	0.01	221.847	7,79341976024496	7.00088e-16
NONHSAT175126.1	13.8978	0.0628676	221.065	7,78832440693927	1.03621e-14
ENST00000584923	60.045	0.271677	221.016	7,78800480228101	6.72609e-23
NONHSAT093731.2	2.18136	0.01	218.136	7,7690821857516	4.93267e-05
NONHSAT005758.2	2.15106	0.01	215.106	7,74890598875198	0.000272943
ENST00000441539	2.14854	0.01	214.854	7,74721030864358	0.00292486
ENST00000629212	2.14578	0.01	214.578	7,74535698125051	1.02195e-05
NONHSAT152228.1	2.13325	0.01	213.325	7,73690694910571	7.46224e-05
ENST00000437551	2.13059	0.01	213.059	7,73511119269789	4.69597e-11
NONHSAT030805.2	2.12348	0.01	212.348	7,73028666030044	2.21027e-05
NONHSAT191084.1	2.11382	0.01	211.382	7,72370697153878	0.00487477
ENST00000457686	2.10663	0.01	210.663	7,71879484099932	0.000175464
NONHSAT174758.1	2.06292	0.01	206.292	7,68854211935594	1.26463e-07
NONHSAT078253.2	2.04898	0.01	204.898	7,67876474008935	5.06167e-10
NONHSAT115862.2	2.04744	0.01	204.744	7,6776806082103	2.22019e-08
ENST00000524131	2.03311	0.01	203.311	7,66754415928954	4.93267e-05
ENST00000612269	2.00027	0.01	200.027	7,64404780936298	0.000428911
ENST00000490006	1.99963	0.01	199.963	7,64358979828995	9.36156e-08
NONHSAT152965.1	1.99453	0.01	199.453	7,63990383002209	1.49728e-05
NONHSAT125636.2	7.14114	0.0358632	199.121	7,63750439474241	3.97687e-18
NONHSAT017203.2	8.55699	0.04315	198.308	7,63159909771122	6.25565e-14
NONHSAT191467.1	1.95131	0.01	195.131	7,60829706123528	3.39013e-06
NONHSAT192574.1	1.92886	0.01	192.886	7,59160832404284	2.34039e-07
NONHSAT160397.1	1.92075	0.01	192.075	7,58552403208025	0.00109407
NONHSAT082898.2	1.91988	0.01	191.988	7,58487549237426	2.06257e-10
ENST00000573772	1.88181	0.01	188.181	7,55597952580071	0.00487477
NONHSAT155225.1	1.86292	0.01	186.292	7,54141936614171	8.05439e-10
NONHSAT211624.1	1.86105	0.01	186.105	7,53997630203815	5.80295e-09
NONHSAT003560.2	1.84056	0.01	184.056	7,52399877850469	0.00109407
NONHSAT163548.1	1.83695	0.01	183.695	7,52117011029199	1.49728e-05
NONHSAT180043.1	5.16797	0.0281357	183.68	7,52104903094638	1.99901e-13
ENST00000614853	1.82662	0.01	182.662	7,51303561283391	1.6852e-08
ENST00000571085	1.82096	0.01	182.096	7,50855463552838	4.93267e-05
NONHSAT175396.1	1.80912	0.01	180.912	7,49914769725624	3.13717e-11
ENST00000623001	1.80626	0.01	180.626	7,49686173221571	0.000428911
NONHSAT209479.1	1.80185	0.01	180.185	7,49333590209527	1.49728e-05
NONHSAT119881.2	1.80158	0.01	180.158	7,49312058607805	1.02195e-05
NONHSAT211527.1	1.79975	0.01	179.975	7,49165666404388	1.02195e-05
NONHSAT078899.2	17.6419	0.0982424	179.575	7,48844246738211	3.15378e-21
NONHSAT041006.2	1.79429	0.01	179.429	7,4872667757167	0.00487477
NONHSAT106538.2	5.47188	0.0306028	178.803	7,48222796506661	2.99032e-13
NONHSAT209476.1	1.77466	0.01	177.466	7,47140163711091	4.93267e-05
NONHSAT048222.2	1.77245	0.01	177.245	7,46960342164223	0.000113897
ENST00000417083	1.74856	0.01	174.856	7,45002732215039	0.000175464
NONHSAT212937.1	1.74708	0.01	174.708	7,44880549773915	6.11649e-07
ENST00000484406	1.72985	0.01	172.985	7,43450595066714	0.000272943
ENST00000444793	1.71836	0.01	171.836	7,42488799056501	0.00487477
ENST00000514409	1.71796	0.01	171.796	7,42455192012338	0.00292486
NONHSAT175031.1	119.742	0.701152	170.779	7,41598522937562	3.10311e-28
ENST00000541574	1.70184	0.01	170.184	7,41095052705988	0.00109407
ENST00000468859	1.70079	0.01	170.079	7,41005981092067	9.81856e-09
NONHSAT036535.2	1.70075	0.01	170.075	7,41002314637079	0.00292486
NONHSAT033777.2	1.70028	0.01	170.028	7,40963270649612	1.33617e-10
ENST00000610008	1.67848	0.01	167.848	7,39101252034405	1.19212e-06
NONHSAT100083.2	1.6682	0.01	166.82	7,38215006990249	3.28845e-05
NONHSAT084561.2	1.66432	0.01	166.432	7,37878873841468	0.000428911
ENST00000543290	1.65756	0.01	165.756	7,37291915170805	0.00292486
NONHSAT171863.1	1.65262	0.01	165.262	7,3686093142293	4.93267e-05
NONHSAT031439.2	1.65255	0.01	165.255	7,36855365413779	3.47644e-09
NONHSAT209097.1	1.65111	0.01	165.111	7,36729460251418	0.00292486
ENST00000504969	1.6486	0.01	164.86	7,36509490572275	0.00487477
ENST00000622794	1.6462	0.01	164.62	7,36299902913135	1.62056e-12
ENST00000626404	1.64429	0.01	164.429	7,36131822537547	0.000681211
ENST00000624053	1.63237	0.01	163.237	7,35082797378921	4.93267e-05
NONHSAT190711.1	1.63117	0.01	163.117	7,34976325196676	0.00487477
NONHSAT105449.2	1.61529	0.01	161.529	7,33564896497336	0.000113897
NONHSAT129085.2	1.60451	0.01	160.451	7,32598585966474	0.00109407
NONHSAT196456.1	1.59751	0.01	159.751	7,31968490348143	2.37815e-06
NONHSAT077219.2	1.59726	0.01	159.726	7,31945739903269	1.02195e-05
NONHSAT099449.2	1.57882	0.01	157.882	7,30269896317479	0.000272943
NONHSAT157293.1	1.5746	0.01	157.46	7,29884185130636	0.000175464
ENST00000440528	1.57198	0.01	157.198	7,29643592193992	4.8641e-06
ENST00000498732	1.5513	0.01	155.13	7,27733653105336	0.000272943
NONHSAT175683.1	1.54994	0.01	154.994	7,27606576021374	7.46224e-05
NONHSAT215564.1	1.54941	0.01	154.941	7,27557730849314	3.89913e-08
NONHSAT050246.2	1.54001	0.01	154.001	7,26679283211095	0.00487477
NONHSAT148480.1	1.51645	0.01	151.645	7,24455116097992	2.70389e-09
NONHSAT145737.2	1.51522	0.01	151.522	7,24338479849148	0.00109407
NONHSAT094445.2	1.51373	0.01	151.373	7,24196854803351	2.34039e-07
ENST00000446880	1.51279	0.01	151.279	7,24107033885753	9.36156e-08
NONHSAT125703.2	1.50421	0.01	150.421	7,23286554116373	7.02592e-06
NONHSAT208971.1	10.5158	0.0703185	149.545	7,22443435224966	4.71484e-12
ENST00000554639	1.48721	0.01	148.721	7,21646355188751	2.34039e-07
NONHSAT169347.1	1.4802	0.01	148.02	7,2096481219769	0.000175464
ENST00000587944	1.47918	0.01	147.918	7,20865836134387	4.93267e-05
ENST00000507044	1.46163	0.01	146.163	7,19143285226766	0.000428911
ENST00000578025	1.45376	0.01	145.376	7,18364500587522	1.6852e-08
ENST00000632503	1.44337	0.01	144.337	7,17329569273113	2.34039e-07
NONHSAT162649.1	1.44147	0.01	144.147	7,17139958691404	2.21027e-05
NONHSAT168340.1	1.43978	0.01	143.978	7,16970279702531	1.19212e-06
NONHSAT008556.2	1.43636	0.01	143.636	7,16627455473618	0.000428911
NONHSAT208894.1	1.4287	0.01	142.87	7,1585633654256	0.00109407
NONHSAT141192.2	1.42595	0.01	142.595	7,15577505933648	4.93267e-05
NONHSAT133412.2	1.41445	0.01	141.445	7,14410046121217	0.00292486
NONHSAT081740.2	1.41031	0.01	141.031	7,13986959398931	2.57184e-10
ENST00000412295	1.40536	0.01	140.536	7,13479728630096	0.00487477
NONHSAT169543.1	1.39915	0.01	139.915	7,12840636914573	0.000428911
NONHSAT181717.1	1.39019	0.01	139.019	7,11913582907146	0.000175464
NONHSAT143558.2	1.38459	0.01	138.459	7,11331479165916	7.46224e-05
NONHSAT030909.2	1.3822	0.01	138.22	7,11082430633787	0.00292486
NONHSAT123268.2	1.37641	0.01	137.641	7,10476189341716	4.93267e-05
ENST00000565342	1.37082	0.01	137.082	7,09889956948962	3.89913e-08
NONHSAT104503.2	33.2752	0.242923	136.978	7,09780350631754	9.87791e-25
NONHSAT026887.2	1.36285	0.01	136.285	7,09048234610553	7.46224e-05
NONHSAT076454.2	1.3508	0.01	135.08	7,07767439474103	3.39013e-06
NONHSAT022142.2	1.34971	0.01	134.971	7,07651018401221	3.10993e-13
NONHSAT070821.2	1.34741	0.01	134.741	7,07404350060347	2.10963e-09
NONHSAT063901.2	1.34525	0.01	134.525	7,07172647352157	0.000113897
ENST00000412114	1.3436	0.01	134.36	7,06996422220675	4.93267e-05
NONHSAT138820.2	1.33747	0.01	133.747	7,0633648577758	0.000175464
ENST00000523766	1.33485	0.01	133.485	7,06053394280548	0.00487477
NONHSAT179906.1	1.32715	0.01	132.715	7,05218402653168	0.000272943
NONHSAT123387.2	1.30431	0.01	130.431	7,02714386986389	0.000681211
NONHSAT212409.1	1.29825	0.01	129.825	7,02042368827272	0.000428911
ENST00000577698	1.29568	0.01	129.568	7,01756805528324	1.49728e-05
NONHSAT115904.2	1.29375	0.01	129.375	7,01541603294941	2.34039e-07
NONHSAT004524.2	1.29247	0.01	129.247	7,01398459027468	1.02195e-05
NONHSAT149872.1	1.29204	0.01	129.204	7,01350427433293	2.21027e-05
ENST00000577066	1.36509	0.0106305	128.413	7,00464937100277	4.73318e-11
NONHSAT165476.1	5.21397	0.0406031	128.413	7,00464937100276	4.73318e-11
NONHSAT028687.2	1.28171	0.01	128.171	7,00192444262216	1.29596e-09
NONHSAT189815.1	1.27629	0.01	127.629	6,99580699133787	6.11649e-07
ENST00000545526	1.2669	0.01	126.69	6,98516120739982	0.00487477
NONHSAT131580.2	1.26648	0.01	126.648	6,98468577235778	0.00109407
ENST00000605357	1.25617	0.01	125.617	6,97289255921515	0.00109407
ENST00000546682	1.24778	0.01	124.778	6,96322441380528	2.51427e-16
ENST00000499583	1.24533	0.01	124.533	6,96038415276273	1.28397e-08
NONHSAT037955.2	1.24436	0.01	124.436	6,95925455720218	0.00109407
ENST00000560292	1.23447	0.01	123.447	6,94774724575671	0.00487477
NONHSAT151850.1	1.21503	0.01	121.503	6,92484684364663	0.00487477
NONHSAT002382.2	14.4723	0.119136	121.477	6,92454205825628	3.87649e-18
NONHSAT203392.1	1.20807	0.01	120.807	6,91656473659977	1.49728e-05
NONHSAT087921.2	1.20619	0.01	120.619	6,91431378442786	1.67869e-06
NONHSAT009387.2	0.753208	0.00626187	120.285	6,91031012238089	1.15555e-10
ENST00000501338	1.20283	0.01	120.283	6,91029177167267	1.26463e-07
ENST00000441033	1.19869	0.01	119.869	6,90531360162506	0.00292486
ENST00000549744	1.1856	0.01	118.56	6,88946980470577	0.000681211
NONHSAT129430.2	1.18517	0.01	118.517	6,88894589214052	0.00487477
NONHSAT152549.1	1.18085	0.01	118.085	6,88368359346008	9.7341e-13
NONHSAT034978.2	1.16686	0.01	116.686	6,86648444631051	4.8641e-06
NONHSAT100084.2	1.15061	0.01	115.061	6,84625004627406	4.93267e-05
ENST00000435312	1.14864	0.01	114.864	6,84377733978225	0.00109407
ENST00000625026	1.14372	0.01	114.372	6,83759331734562	7.02592e-06
NONHSAT200272.1	1.13182	0.01	113.182	6,82250114860844	7.46224e-05
ENST00000479041	1.13156	0.01	113.156	6,82217236632481	0.00292486
ENST00000628013	1.12705	0.01	112.705	6,81641309703612	0.00292486
NONHSAT189080.1	1.1198	0.01	111.98	6,80709945260187	0.00487477
ENST00000435315	1.11013	0.01	111.013	6,79459045769529	0.00487477
NONHSAT107168.2	1.10966	0.01	110.966	6,79397056198101	0.000113897
NONHSAT203931.1	1.10427	0.01	110.427	6,78694628674669	1.02195e-05
NONHSAT046822.2	1.10427	0.01	110.427	6,78694534977115	0.000272943
NONHSAT029616.2	1.1022	0.01	110.22	6,78424851347384	0.00487477
ENST00000589281	1.10063	0.01	110.063	6,78218899129554	0.00487477
ENST00000431385	1.09822	0.01	109.822	6,77902454736813	0.00109407
NONHSAT112767.2	2.057	0.0188878	108.906	6,76694562182833	5.26348e-10
NONHSAT094719.2	1.08885	0.01	108.885	6,76666709602694	0.000428911
NONHSAT123274.2	1.082	0.01	108.2	6,75755812920019	0.000681211
NONHSAT200805.1	3.98756	0.0371692	107.281	6,74525748232275	6.41495e-10
NONHSAT209666.1	1.06886	0.01	106.886	6,73992395456509	0.00292486
ENST00000576948	1.05819	0.01	105.819	6,72546072525313	0.00292486
NONHSAT063981.2	1.05016	0.01	105.016	6,71445984273744	0.000272943
NONHSAT156967.1	1.04845	0.01	104.845	6,71211880799272	0.000113897
NONHSAT215742.1	13.9486	0.134082	104.031	6,70086527256691	2.2837e-13
NONHSAT219208.1	3.10357	0.0298334	104.03	6,7008526691429	9.58552e-10
NONHSAT009072.2	1.03404	0.01	103.404	6,69214272075123	0.000681211
NONHSAT221488.1	1.02994	0.01	102.994	6,68641862452483	1.49728e-05
ENST00000504038	1.02663	0.01	102.663	6,68176890585734	0.000681211
NONHSAT195819.1	7.69089	0.0751029	102.405	6,67813979461288	1.17531e-09
ENST00000436364	1.01932	0.01	101.932	6,67146915248648	0.000681211
NONHSAT063989.2	1.01232	0.01	101.232	6,6615189455894	0.000428911
ENST00000601389	1.0063	0.01	100.63	6,65292331736584	0.00109407
NONHSAT162673.1	0.999409	0.01	99.9409	6,64300258803808	3.28845e-05
NONHSAT147939.2	0.998706	0.01	99.8706	6,64198783968469	0.00109407
NONHSAT050219.2	0.998025	0.01	99.8025	6,64100387175943	0.000681211
ENST00000566847	0.982259	0.01	98.2259	6,61803164954458	0.00292486
ENST00000507197	0.981123	0.01	98.1123	6,61636282918396	0.00292486
NONHSAT176336.1	0.980721	0.01	98.0721	6,61577031894837	0.00109407
NONHSAT087073.2	4.00794	0.0410952	97.5281	6,60774662567526	2.19422e-09
NONHSAT027210.2	0.971829	0.01	97.1829	6,60263048117553	7.46224e-05
ENST00000621378	0.970495	0.01	97.0495	6,60064857513444	0.00487477
NONHSAT113548.2	0.96069	0.01	96.069	6,58599905134033	0.000175464
NONHSAT157208.1	0.960036	0.01	96.0036	6,58501659231662	1.49728e-05
ENST00000623486	4.51592	0.0470883	95.9032	6,58350682661302	2.71369e-09
NONHSAT134601.2	0.958656	0.01	95.8656	6,5829407270233	1.02022e-09
ENST00000576873	0.955418	0.01	95.5418	6,57806051289513	0.00109407
NONHSAT175633.1	0.953807	0.01	95.3807	6,57562604207265	7.46224e-05
ENST00000512486	0.9537	0.01	95.37	6,57546373287618	0.00487477
NONHSAT094456.2	0.951348	0.01	95.1348	6,57190152108889	0.00487477
NONHSAT114838.2	0.950177	0.01	95.0177	6,57012370812098	0.00487477
ENST00000415295	0.949297	0.01	94.9297	6,56878813052473	0.00292486
NONHSAT068927.2	0.947494	0.01	94.7494	6,56604529736171	0.000428911
NONHSAT160594.1	6.32044	0.067041	94.2773	6,55883887949376	1.1355e-12
NONHSAT147607.2	0.937062	0.01	93.7062	6,55007302483656	0.000272943
NONHSAT160035.1	0.936339	0.01	93.6339	6,54895909812294	0.00487477
NONHSAT047178.2	0.931066	0.01	93.1066	6,54081154497483	8.51511e-07
NONHSAT032794.2	0.929578	0.01	92.9578	6,5385045083377	0.000681211
NONHSAT050184.2	0.925628	0.01	92.5628	6,53236083924052	0.000113897
ENST00000438418	0.922864	0.01	92.2864	6,52804671850656	0.000272943
NONHSAT002059.2	0.916492	0.01	91.6492	6,51805076844782	0.00292486
NONHSAT094103.2	0.914655	0.01	91.4655	6,51515557345663	0.000113897
NONHSAT084640.2	1.06339	0.0116823	91.0265	6,50821479317056	5.20473e-09
NONHSAT035921.2	0.903578	0.01	90.3578	6,49757764919169	3.39013e-06
NONHSAT168568.1	2.19073	0.0245044	89.4016	6,48222796506661	6.49754e-09
NONHSAT188705.1	0.89118	0.01	89.118	6,47764521735228	2.34039e-07
NONHSAT089488.2	0.888693	0.01	88.8693	6,47361401051075	2.70389e-09
NONHSAT173411.1	0.880294	0.01	88.0294	6,45991337877507	6.11649e-07
NONHSAT033329.2	0.874535	0.01	87.4535	6,45044341003462	7.53517e-09
NONHSAT125552.2	0.869296	0.01	86.9296	6,44177565319702	0.00109407
NONHSAT175793.1	1.13397	0.0131628	86.1498	6,42877597732118	1.02022e-08
NONHSAT145379.2	3.3137	0.0384644	86.1498	6,42877597732118	1.02022e-08
ENST00000608184	0.860922	0.01	86.0922	6,42781109747205	1.71629e-07
ENST00000458028	0.860425	0.01	86.0425	6,42697789386461	0.000272943
ENST00000517420	0.858224	0.01	85.8224	6,42328231979171	3.28845e-05
NONHSAT185109.1	0.849293	0.01	84.9293	6,40819040842856	0.000681211
ENST00000561181	0.844522	0.01	84.4522	6,40006285753218	0.000428911
NONHSAT219435.1	0.844139	0.01	84.4139	6,39940927024809	0.00487477
NONHSAT196372.1	0.84076	0.01	84.076	6,39362154454145	2.85986e-14
ENST00000622718	0.833666	0.01	83.3666	6,38139730563236	0.00292486
ENST00000535436	0.82587	0.01	82.587	6,36784280550479	0.00109407
NONHSAT118595.2	0.824071	0.01	82.4071	6,36469617846828	7.02592e-06
NONHSAT037687.2	8.33199	0.101372	82.1922	6,36093007063876	3.32518e-18
NONHSAT221203.1	0.821194	0.01	82.1194	6,35965066641141	2.21027e-05
ENST00000513379	0.819919	0.01	81.9919	6,35740871257762	0.00487477
NONHSAT143762.2	0.818568	0.01	81.8568	6,3550301543204	0.00109407
NONHSAT152217.1	0.818438	0.01	81.8438	6,3548019464992	0.000272943
NONHSAT170600.1	0.816448	0.01	81.6448	6,35128910619772	3.28845e-05
NONHSAT137586.2	0.815743	0.01	81.5743	6,35004284086324	6.11649e-07
NONHSAT212463.1	0.815247	0.01	81.5247	6,34916479840863	0.00292486
NONHSAT194208.1	0.814407	0.01	81.4407	6,34767751206582	0.000272943
ENST00000609596	0.811076	0.01	81.1076	6,34176544342348	7.02592e-06
NONHSAT033299.2	0.806327	0.01	80.6327	6,33329312792178	0.000175464
ENST00000437232	0.799514	0.01	79.9514	6,32105144708813	0.000428911
ENST00000425449	0.798145	0.01	79.8145	6,31857896625525	2.37815e-06
ENST00000429962	0.794153	0.01	79.4153	6,31134473403817	0.000681211
NONHSAT076791.2	3.68846	0.0467866	78.8357	6,3007774650957	1.77358e-11
NONHSAT096500.2	0.786071	0.01	78.6071	6,29658828073118	1.65814e-10
NONHSAT080113.2	0.770957	0.01	77.0957	6,26857841110793	0.000681211
NONHSAT042163.2	0.768785	0.01	76.8785	6,26450899130553	0.000428911
ENST00000606915	0.765124	0.01	76.5124	6,25762203614826	0.00109407
ENST00000557966	0.759778	0.01	75.9778	6,24750568122474	0.00292486
NONHSAT148441.1	15.6217	0.207453	75.3025	6,23462670433047	6.60068e-17
NONHSAT030545.2	11.9264	0.158539	75.2267	6,23317275121232	1.65104e-17
NONHSAT216573.1	0.750529	0.01	75.0529	6,22983507611228	0.00487477
NONHSAT087516.2	0.748473	0.01	74.8473	6,2258786337432	4.8641e-06
NONHSAT209114.1	1.58936	0.0212562	74.7715	6,22441681710765	6.91079e-08
NONHSAT185703.1	0.745453	0.01	74.5453	6,22004457291947	0.00487477
ENST00000474768	0.743115	0.01	74.3115	6,21551337915698	1.02195e-05
ENST00000446527	0.738319	0.01	73.8319	6,20617239833791	0.00487477
NONHSAT138814.2	0.735926	0.01	73.5926	6,20148822619387	6.11649e-07
NONHSAT211778.1	0.735888	0.01	73.5888	6,20141381102051	0.000681211
NONHSAT212704.1	0.734791	0.01	73.4791	6,19926296669009	0.000428911
ENST00000563863	2.0092	0.0274682	73.1466	6,1927180888217	8.89497e-08
NONHSAT009553.2	0.73038	0.01	73.038	6,19057470716774	4.93267e-05
ENST00000397264	0.730379	0.01	73.0379	6,19057368416297	2.34039e-07
ENST00000605270	0.728558	0.01	72.8558	6,18697275131382	0.00487477
NONHSAT124357.2	0.727467	0.01	72.7467	6,18480920949881	3.85245e-15
NONHSAT124864.2	0.721491	0.01	72.1491	6,17290992485368	0.000272943
NONHSAT012896.2	0.721028	0.01	72.1028	6,17198388118791	0.00109407
NONHSAT087922.2	0.716956	0.01	71.6956	6,16381244366809	7.46224e-05
NONHSAT192256.1	0.772066	0.0107949	71.5216	6,16030720301469	1.14854e-07
NONHSAT179844.1	2.88181	0.0402929	71.5216	6,16030720301469	1.14854e-07
NONHSAT013780.2	3.47469	0.0485824	71.5216	6,16030720301468	1.14854e-07
NONHSAT179950.1	4.09009	0.0571868	71.5216	6,16030720301468	1.14854e-07
NONHSAT101321.2	1.02747	0.0143659	71.5216	6,16030720301467	1.14854e-07
NONHSAT216871.1	14.4151	0.20158	71.5103	6,16007992681385	1.55966e-16
NONHSAT216219.1	0.713382	0.01	71.3382	6,15660277875319	0.000681211
ENST00000573866	21.1959	0.29812	71.0986	6,15174841278388	4.4233e-14
ENST00000419542	0.707258	0.01	70.7258	6,14416398636497	0.00109407
NONHSAT205012.1	0.874141	0.0124139	70.4161	6,13783333310777	1.08894e-12
NONHSAT168435.1	0.703677	0.01	70.3677	6,13684046615627	0.000428911
ENST00000619086	0.702046	0.01	70.2046	6,13349361196047	4.93267e-05
NONHSAT211924.1	0.701377	0.01	70.1377	6,13211804217542	0.000272943
NONHSAT145437.2	6.30723	0.0902377	69.8957	6,12713266518103	1.12758e-10
NONHSAT031027.2	0.695817	0.01	69.5817	6,12063607400251	1.71629e-07
NONHSAT044056.2	0.695567	0.01	69.5567	6,12011851239832	0.00109407
NONHSAT133716.2	0.694477	0.01	69.4477	6,11785531515077	2.21027e-05
NONHSAT135253.2	0.688839	0.01	68.8839	6,10609594553146	0.00109407
NONHSAT004843.2	0.688627	0.01	68.8627	6,10565178441138	4.67875e-12
NONHSAT202820.1	0.686167	0.01	68.6167	6,10048771722248	4.8641e-06
NONHSAT141042.2	1.04564	0.0153162	68.2699	6,09317729389173	1.93397e-07
ENST00000385214	29.4585	0.4315	68.2699	6,09317729389172	1.93397e-07
NONHSAT001189.2	0.681005	0.01	68.1005	6,08959289431508	0.000113897
ENST00000423984	0.674147	0.01	67.4147	6,07499206020076	7.46224e-05
NONHSAT002657.2	0.668284	0.01	66.8284	6,06238977288267	1.19212e-06
NONHSAT002185.2	1.16598	0.0174954	66.6449	6,05842311775878	2.52246e-07
NONHSAT073201.2	0.663088	0.01	66.3088	6,05112852120948	6.11649e-07
NONHSAT173192.1	0.658907	0.01	65.8907	6,04200227359343	0.00292486
ENST00000635107	0.658396	0.01	65.8396	6,0408826033464	0.00292486
ENST00000379317	0.873775	0.0134386	65.02	6,02281101206291	3.30164e-07
NONHSAT171962.1	0.659157	0.0101378	65.02	6,02281101206291	3.30164e-07
NONHSAT127683.2	4.1149	0.0632867	65.02	6,02281101206291	3.30164e-07
ENST00000508827	0.650119	0.01	65.0119	6,02263259344945	1.28397e-08
NONHSAT208970.1	13.762	0.211708	65.0045	6,02246827661687	1.79334e-13
NONHSAT077537.2	20.5473	0.316645	64.8906	6,01993663925547	1.24383e-18
ENST00000450704	0.647524	0.01	64.7524	6,01686222903615	0.000681211
ENST00000499713	0.646057	0.01	64.6057	6,01359047404807	0.00109407
NONHSAT070895.2	0.644123	0.01	64.4123	6,00926389696327	1.02195e-05
ENST00000453342	0.640578	0.01	64.0578	6,00130151563747	2.37815e-06
NONHSAT126707.2	0.639643	0.01	63.9643	5,99919454542247	2.21027e-05
NONHSAT156727.1	0.635222	0.01	63.5222	5,98918820196548	0.000681211
ENST00000557440	0.635189	0.01	63.5189	5,98911488222526	8.51511e-07
ENST00000411919	9.46213	0.149261	63.3932	5,9862561806691	4.33718e-07
NONHSAT058560.2	1.92635	0.0303873	63.3932	5,98625618066909	4.33718e-07
ENST00000609170	2.72921	0.0430522	63.3932	5,98625618066909	4.28378e-10
ENST00000513591	1.73227	0.0273259	63.3932	5,98625618066909	4.33718e-07
ENST00000499504	0.630861	0.01	63.0861	5,97925093677877	0.00487477
NONHSAT104161.2	0.630043	0.01	63.0043	5,97737767411136	5.80295e-09
NONHSAT221096.1	0.62861	0.01	62.861	5,97409443995869	0.000272943
ENST00000549793	0.622384	0.01	62.2384	5,95973313736961	3.39013e-06
NONHSAT038051.2	0.619921	0.01	61.9921	5,95401242045015	0.00292486
NONHSAT021879.2	0.618437	0.01	61.8437	5,9505548622518	0.00109407
NONHSAT223367.1	1.08066	0.0174954	61.7682	5,94879344934556	5.71872e-07
NONHSAT176359.1	1.60824	0.0260368	61.7682	5,94879344934555	5.71872e-07
NONHSAT199417.1	9.13343	0.147866	61.7682	5,94879344934555	5.71872e-07
ENST00000457668	0.615704	0.01	61.5704	5,94416517407929	0.000175464
NONHSAT002470.2	5.4197	0.0887547	61.0638	5,93224486139912	6.75917e-16
NONHSAT007597.2	0.609451	0.01	60.9451	5,92943891269972	3.2072e-07
NONHSAT171002.1	0.606484	0.01	60.6484	5,92239785076478	4.93267e-05
ENST00000580996	0.605547	0.01	60.5547	5,92016735455021	0.000113897
NONHSAT220708.1	0.708714	0.0117838	60.1433	5,91033192276684	7.56916e-07
ENST00000338573	1.71866	0.0285762	60.1433	5,91033192276684	7.56916e-07
NONHSAT067901.2	3.00174	0.0499106	60.1424	5,9103101223809	8.64399e-10
NONHSAT023582.2	0.601347	0.01	60.1347	5,91012498428106	2.34039e-07
NONHSAT039760.2	2.47038	0.0413641	59.7228	5,90020964578792	7.27747e-13
ENST00000444431	1.84423	0.0312363	59.0412	5,88364950330943	1.65448e-11
ENST00000556569	0.588067	0.01	58.8067	5,87790762068808	0.00487477
NONHSAT016803.2	0.585291	0.01	58.5291	5,87108196680575	0.00292486
NONHSAT097073.2	0.580524	0.01	58.0524	5,85928360692647	6.11649e-07
NONHSAT170553.1	0.576823	0.01	57.6823	5,85005578630055	0.00109407
NONHSAT120007.2	0.57611	0.01	57.611	5,84827164305248	4.8641e-06
ENST00000440007	0.575525	0.01	57.5525	5,84680565643429	8.05439e-10
NONHSAT202543.1	0.573212	0.01	57.3212	5,84099693069584	0.00487477
NONHSAT023757.2	6.97349	0.121732	57.2854	5,84009682575509	1.36848e-12
ENST00000440088	0.570366	0.01	57.0366	5,83381520155194	0.000272943
NONHSAT169787.1	3.18814	0.056039	56.8916	5,83014288805793	1.34182e-06
NONHSAT175794.1	1.87655	0.0329847	56.8916	5,83014288805793	1.34182e-06
ENST00000530176	0.568226	0.01	56.8226	5,82839211245261	7.46224e-05
NONHSAT178031.1	0.567899	0.01	56.7899	5,82756187555325	1.26463e-07
NONHSAT103637.2	0.564512	0.01	56.4512	5,81893326880477	0.00109407
ENST00000383461	0.563797	0.01	56.3797	5,81710370061454	4.93267e-05
NONHSAT089901.2	0.561284	0.01	56.1284	5,81065973878423	0.000681211
NONHSAT162383.1	0.55918	0.01	55.918	5,80524151400554	1.62056e-12
NONHSAT075452.2	3.36872	0.0603804	55.7916	5,80197677002277	4.27344e-11
NONHSAT215799.1	0.55735	0.01	55.735	5,80051055099873	0.000428911
ENST00000590838	0.553064	0.01	55.3064	5,78937436899984	7.46224e-05
NONHSAT203686.1	2.39346	0.0433075	55.2666	5,78833626891529	1.79758e-06
NONHSAT222872.1	0.872375	0.0157848	55.2666	5,78833626891529	1.79758e-06
ENST00000340131	1.48289	0.0268315	55.2666	5,78833626891529	1.79758e-06
NONHSAT025080.2	0.542107	0.01	54.2107	5,76050466033566	4.8641e-06
ENST00000623468	0.541001	0.01	54.1001	5,75755812920019	0.000681211
NONHSAT172827.1	11.7651	0.218262	53.9035	5,7523080942501	2.04883e-14
NONHSAT213578.1	0.538676	0.01	53.8676	5,75134630026693	0.000681211
ENST00000448093	0.537668	0.01	53.7668	5,74864476874588	0.000175464
NONHSAT179210.1	0.113874	0.00212286	53.6417	5,74528192504541	2.4184e-06
NONHSAT010078.2	6.63047	0.123607	53.6417	5,7452819250454	2.4184e-06
NONHSAT007098.2	0.535422	0.01	53.5422	5,74260500513141	3.28845e-05
NONHSAT100917.2	0.534656	0.01	53.4656	5,74053954531034	0.000681211
NONHSAT099505.2	3.56345	0.0674639	52.8201	5,72301499306935	2.82906e-14
ENST00000341745	0.525006	0.01	52.5006	5,71426135958197	1.49728e-05
ENST00000469595	0.524503	0.01	52.4503	5,71287809405133	0.00487477
NONHSAT114832.2	0.524503	0.01	52.4503	5,71287809405133	0.00487477
ENST00000587877	0.522313	0.01	52.2313	5,70684293609888	0.000428911
NONHSAT105836.2	0.517223	0.01	51.7223	5,69271430939857	7.46224e-05
NONHSAT202105.1	0.507868	0.01	50.7868	5,66638174160905	7.02592e-06
ENST00000445865	0.507342	0.01	50.7342	5,66488650209651	0.000681211
NONHSAT060469.2	0.50701	0.01	50.701	5,66394231832599	0.00109407
NONHSAT203423.1	1.5052	0.029871	50.3899	5,6550636157538	6.04853e-06
ENST00000608694	0.337676	0.00670126	50.3899	5,6550636157538	6.04853e-06
ENST00000568395	0.428784	0.00850932	50.3899	5,6550636157538	6.04853e-06
NONHSAT193696.1	3.21906	0.0638829	50.3899	5,6550636157538	6.04853e-06
NONHSAT002592.2	0.627758	0.012458	50.3899	5,65506361575379	6.04853e-06
NONHSAT005301.2	0.500118	0.01	50.0118	5,64419520220111	0.000272943
NONHSAT116200.2	0.49805	0.01	49.805	5,63821913800458	1.71629e-07
NONHSAT182795.1	0.497755	0.01	49.7755	5,63736312779652	0.00292486
NONHSAT005430.2	0.497128	0.01	49.7128	5,63554678311903	0.00487477
NONHSAT176292.1	0.495706	0.01	49.5706	5,63141292529791	0.000428911
NONHSAT083713.2	4.30196	0.0867927	49.5659	5,63127652754982	1.31216e-11
NONHSAT219240.1	0.492999	0.01	49.2999	5,62351268348618	0.00487477
NONHSAT000109.2	0.492131	0.01	49.2131	5,6209716305039	6.11649e-07
NONHSAT026886.2	0.489857	0.01	48.9857	5,61428766244175	7.46224e-05
NONHSAT077133.2	0.489051	0.01	48.9051	5,61191161922491	4.8641e-06
ENST00000620190	1.83701	0.0376706	48.765	5,60777351278407	8.28724e-06
NONHSAT092455.2	0.780914	0.0160138	48.765	5,60777351278407	8.28724e-06
NONHSAT192089.1	10.3678	0.212657	48.7536	5,60743749913088	1.88462e-11
NONHSAT106801.2	0.485859	0.01	48.5859	5,6024644281632	0.00487477
NONHSAT152733.1	0.485722	0.01	48.5722	5,60205759151891	0.000681211
ENST00000484698	0.482566	0.01	48.2566	5,59265514139115	0.000113897
NONHSAT000343.2	0.482474	0.01	48.2474	5,59237938423609	1.49728e-05
NONHSAT207688.1	2.97519	0.0620458	47.9516	5,58350682661302	1.88173e-08
ENST00000466734	1.66315	0.034684	47.9516	5,58350682661302	1.88173e-08
NONHSAT034390.2	0.477558	0.01	47.7558	5,57760313021927	0.000175464
NONHSAT080583.2	0.477543	0.01	47.7543	5,57755815229986	5.06167e-10
ENST00000408887	0.477217	0.01	47.7217	5,57657243123572	0.00109407
ENST00000468356	0.47312	0.01	47.312	5,56413510837516	0.000681211
ENST00000624795	2.40329	0.0509828	47.1391	5,55885278666369	2.31911e-08
ENST00000523017	2.92473	0.0620458	47.1382	5,55882497218977	1.14102e-05
NONHSAT133739.2	1.32313	0.0280692	47.1382	5,55882497218976	1.14102e-05
ENST00000569087	0.470678	0.01	47.0678	5,55666878004302	0.000681211
NONHSAT072986.2	0.470167	0.01	47.0167	5,55510010179245	0.00487477
NONHSAT213990.1	0.470036	0.01	47.0036	5,5547003237677	0.000428911
NONHSAT026840.2	0.468918	0.01	46.8918	5,55126289066068	0.000681211
NONHSAT076517.2	5.30977	0.113646	46.722	5,54602935591599	3.49717e-11
NONHSAT180079.1	0.463828	0.01	46.3828	5,53551736297296	0.00109407
NONHSAT046904.2	0.463152	0.01	46.3152	5,53341429312174	1.28397e-08
NONHSAT115730.2	0.461485	0.01	46.1485	5,52821338729611	0.00292486
ENST00000499131	0.460898	0.01	46.0898	5,52637581275582	0.00487477
NONHSAT194272.1	0.455933	0.01	45.5933	5,51075033050405	2.37815e-06
NONHSAT124860.2	1.67724	0.0368517	45.5133	5,50821479317057	1.57894e-05
NONHSAT212025.1	1.76928	0.0388739	45.5133	5,50821479317057	1.57894e-05
NONHSAT181451.1	0.450341	0.01	45.0341	5,49294668221233	1.67869e-06
NONHSAT055515.2	1.51931	0.0339885	44.7008	5,48222796506661	4.3989e-08
ENST00000594721	5.67306	0.126912	44.7008	5,48222796506661	4.3989e-08
NONHSAT101044.2	0.446996	0.01	44.6996	5,48218910140849	0.000272943
NONHSAT096464.2	5.41696	0.121453	44.6014	5,4790181677981	1.96194e-14
NONHSAT135342.2	5.96854	0.134778	44.2842	5,46871951139237	7.53599e-11
NONHSAT068391.2	0.442551	0.01	44.2551	5,4677731201743	0.000272943
NONHSAT004290.2	0.441712	0.01	44.1712	5,46503518001273	7.46224e-05
NONHSAT056744.2	0.441235	0.01	44.1235	5,46347556372116	0.000428911
NONHSAT035204.2	1.52948	0.0348495	43.8883	5,45576444446925	2.19629e-05
NONHSAT207459.1	0.559989	0.0127594	43.8883	5,45576444446925	2.19629e-05
ENST00000333319	0.908882	0.020709	43.8883	5,45576444446925	2.19629e-05
NONHSAT000158.2	3.06665	0.0705433	43.4719	5,44201074890271	9.79838e-11
ENST00000440444	0.432403	0.01	43.2403	5,43430564480586	0.000428911
ENST00000613502	4.37585	0.101223	43.2299	5,43395614982808	3.66823e-12
ENST00000499966	0.431206	0.01	43.1206	5,43030689245144	0.00109407
NONHSAT107501.2	0.430805	0.01	43.0805	5,42896360088243	0.00109407
ENST00000504474	0.430435	0.01	43.0435	5,42772238671967	0.000175464
NONHSAT072073.2	0.429925	0.01	42.9925	5,42601287725165	0.00292486
NONHSAT028957.2	0.429829	0.01	42.9829	5,42569149659574	0.00487477
NONHSAT105975.2	0.428754	0.01	42.8754	5,42207923838143	3.28845e-05
NONHSAT101284.2	0.423051	0.01	42.3051	5,40275997150578	4.93267e-05
ENST00000453026	0.422856	0.01	42.2856	5,40209425034543	0.00292486
ENST00000416928	0.473658	0.0112078	42.2615	5,40127299718591	3.07135e-05
ENST00000566457	11.5954	0.275513	42.0865	5,39528408247603	4.70574e-17
NONHSAT151702.1	0.418634	0.01	41.8634	5,38761926967545	0.00487477
NONHSAT215952.1	0.417731	0.01	41.7731	5,38450192219874	3.39013e-06
NONHSAT103491.2	2.27268	0.0544902	41.708	5,3822538335635	2.69705e-09
NONHSAT103638.2	0.4166	0.01	41.66	5,38059124204592	0.00487477
ENST00000438048	0.416151	0.01	41.6151	5,37903409668063	0.00487477
NONHSAT026831.2	0.411051	0.01	41.1051	5,36124669047528	0.00487477
NONHSAT123645.2	14.4654	0.353343	40.9387	5,355394006057	1.65945e-17
ENST00000382375	0.408893	0.01	40.8893	5,35365213926812	0.000681211
ENST00000582106	0.407147	0.01	40.7147	5,34747749224771	0.00487477
NONHSAT215574.1	0.407147	0.01	40.7147	5,34747749224771	0.00487477
ENST00000587174	6.06546	0.149261	40.6366	5,34470684235958	1.33978e-07
NONHSAT202104.1	0.782481	0.0192556	40.6366	5,34470684235957	4.31873e-05
NONHSAT005332.2	0.647471	0.0159332	40.6366	5,34470684235957	4.31873e-05
NONHSAT012789.2	1.55801	0.0383401	40.6366	5,34470684235957	4.31873e-05
ENST00000317019	0.543788	0.0133817	40.6366	5,34470684235957	4.31873e-05
NONHSAT100165.2	1.01091	0.0248768	40.6366	5,34470684235957	4.31873e-05
NONHSAT055865.2	1.15914	0.0285246	40.6366	5,34470684235957	4.31873e-05
ENST00000414287	0.877931	0.0216045	40.6366	5,34470684235957	4.31873e-05
NONHSAT126486.2	0.530623	0.0130578	40.6366	5,34470684235957	4.31873e-05
NONHSAT192631.1	1.25085	0.0307815	40.6366	5,34470684235957	4.31873e-05
NONHSAT017013.2	0.404397	0.01	40.4397	5,3376991457787	0.000428911
NONHSAT015194.2	0.40086	0.01	40.086	5,32502784921679	0.000113897
NONHSAT217585.1	1.77758	0.0445601	39.8916	5,31801436727207	3.30427e-14
ENST00000425189	0.396761	0.01	39.6761	5,31019838454301	0.00292486
NONHSAT171004.1	0.395667	0.01	39.5667	5,30621362593502	0.000681211
ENST00000627215	0.393312	0.01	39.3312	5,29760050480151	4.93267e-05
NONHSAT215801.1	0.392177	0.01	39.2177	5,29343436788124	0.00292486
NONHSAT090523.2	0.390963	0.01	39.0963	5,28896000268127	0.00109407
NONHSAT068312.2	6.34139	0.162551	39.0116	5,28583197440494	6.10714e-05
NONHSAT157728.1	1.30263	0.0333908	39.0116	5,28583197440494	2.69409e-07
NONHSAT176260.1	1.70036	0.0435859	39.0116	5,28583197440494	6.10714e-05
NONHSAT029920.2	0.77802	0.0199433	39.0116	5,28583197440493	6.10714e-05
NONHSAT090277.2	4.38788	0.112476	39.0116	5,28583197440493	6.10714e-05
ENST00000467438	0.389811	0.01	38.9811	5,28470157020454	0.00109407
NONHSAT196603.1	0.387983	0.01	38.7983	5,27791991056509	0.000428911
NONHSAT213553.1	0.385579	0.01	38.5579	5,26895417340042	0.00487477
NONHSAT135333.2	0.384916	0.01	38.4916	5,26647263317324	4.8641e-06
NONHSAT163337.1	0.384014	0.01	38.4014	5,26308849742926	0.00292486
NONHSAT081261.2	1.85655	0.0484611	38.3101	5,25965120909235	1.64385e-12
NONHSAT220187.1	0.38181	0.01	38.181	5,25478317269209	0.000681211
NONHSAT179793.1	78.9885	2.07784	38.0147	5,24848363304504	5.18582e-17
NONHSAT216220.1	0.378022	0.01	37.8022	5,24039915827344	0.00487477
ENST00000468439	0.377691	0.01	37.7691	5,23913474252814	0.00292486
NONHSAT176492.1	19.4139	0.514897	37.7044	5,23665967630941	1.60357e-13
NONHSAT047701.2	0.23705	0.0063405	37.3867	5,22445188717854	8.68659e-05
NONHSAT211535.1	0.898966	0.0240451	37.3867	5,22445188717854	8.68659e-05
ENST00000440001	1.93941	0.0518743	37.3867	5,22445188717854	8.68659e-05
ENST00000515356	1.78613	0.0477755	37.3858	5,22441681710766	4.35067e-07
NONHSAT183303.1	5.51096	0.150683	36.5733	5,19271808882169	5.55233e-07
ENST00000506741	9.24608	0.252866	36.5651	5,19239551866029	1.22955e-09
NONHSAT091673.2	0.364706	0.01	36.4706	5,1886636563027	0.00292486
NONHSAT074192.2	2.42119	0.0667154	36.2913	5,18155304358397	1.92552e-08
NONHSAT031957.2	0.362425	0.01	36.2425	5,179609489786	0.000113897
NONHSAT116206.2	0.361887	0.01	36.1887	5,17746790254698	0.00487477
NONHSAT115584.2	0.361753	0.01	36.1753	5,17693185367954	0.00292486
NONHSAT221468.1	0.360534	0.01	36.0534	5,17206454401765	0.00487477
NONHSAT189513.1	0.357859	0.01	35.7859	5,16131816255365	0.00487477
NONHSAT166195.1	1.93766	0.0541838	35.7608	5,16030720301469	7.10661e-07
NONHSAT160893.1	0.16159	0.00451876	35.7599	5,16027053846481	0.000124298
NONHSAT027580.2	0.47638	0.0133216	35.7599	5,1602705384648	0.000124298
NONHSAT123244.2	2.90144	0.0811368	35.7599	5,1602705384648	0.000124298
NONHSAT122540.2	0.354682	0.01	35.4682	5,14845537275434	0.000113897
NONHSAT100029.2	6.10414	0.174703	34.9401	5,12681009501962	2.25752e-09
NONHSAT034981.2	2.59883	0.0749671	34.6663	5,11546009089855	3.40698e-08
NONHSAT048000.2	0.344653	0.01	34.4653	5,10707394194124	0.000428911
ENST00000558717	1.47025	0.0430717	34.1349	5,09317729389173	0.00017896
NONHSAT124368.2	0.874846	0.0256291	34.1349	5,09317729389172	0.00017896
NONHSAT136468.2	0.212655	0.00622982	34.1349	5,09317729389172	0.00017896
NONHSAT192913.1	1.26185	0.0369665	34.1349	5,09317729389172	0.00017896
NONHSAT141388.2	0.340938	0.01	34.0938	5,09143875603927	0.00487477
NONHSAT211636.1	0.340658	0.01	34.0658	5,09025141632726	6.11649e-07
ENST00000486671	0.338926	0.01	33.8926	5,08290030477543	0.00292486
NONHSAT040399.2	17.988	0.533434	33.7212	5,07558228560024	4.22307e-09
NONHSAT215497.1	59.4935	1.78137	33.3976	5,0616725035219	1.09433e-15
NONHSAT219142.1	0.333857	0.01	33.3857	5,06115808083853	3.28845e-05
NONHSAT156116.1	0.333381	0.01	33.3381	5,05910190649137	0.00109407
ENST00000566996	0.333338	0.01	33.3338	5,05891526649238	0.000681211
NONHSAT135084.2	0.332352	0.01	33.2352	5,05463940361063	0.000428911
NONHSAT163930.1	6.95106	0.209319	33.208	5,05345936474675	2.91515e-15
NONHSAT029608.2	7.18685	0.216774	33.1537	5,05109679686067	2.19961e-10
NONHSAT126703.2	0.328179	0.01	32.8179	5,0364125918978	0.00292486
ENST00000561042	0.327997	0.01	32.7997	5,03561096646491	0.000681211
NONHSAT211927.1	0.327601	0.01	32.7601	5,03386761797627	0.00109407
ENST00000569460	0.308803	0.0094987	32.51	5,02281101206291	0.000259302
NONHSAT024894.2	0.941481	0.0289597	32.51	5,02281101206291	0.000259302
NONHSAT175528.1	0.961425	0.0295732	32.51	5,02281101206291	0.000259302
NONHSAT151729.1	1.41958	0.0436661	32.51	5,02281101206291	0.000259302
NONHSAT114937.2	0.728903	0.0224209	32.51	5,02281101206291	0.000259302
ENST00000585484	0.589865	0.0181441	32.51	5,02281101206291	0.000259302
ENST00000623284	0.629574	0.0193656	32.51	5,02281101206291	0.000259302
NONHSAT184313.1	0.741512	0.0228087	32.51	5,02281101206291	0.000259302
NONHSAT035646.2	0.323706	0.01	32.3706	5,01661393664446	0.00109407
ENST00000544214	0.32355	0.01	32.355	5,01591705944307	0.00292486
NONHSAT155975.1	7.31535	0.22667	32.2732	5,01226500314395	2.62382e-11
NONHSAT179559.1	0.318721	0.01	31.8721	4,9942221945273	0.000681211
NONHSAT137212.2	2.46736	0.0792081	31.1503	4,9611743705685	1.34542e-10
NONHSAT080292.2	0.31073	0.01	31.073	4,95759107912932	0.00487477
ENST00000437964	1.09971	0.0356077	30.8841	4,94879344934555	3.33496e-06
NONHSAT097115.2	1.48975	0.0482368	30.8841	4,94879344934555	3.33496e-06
NONHSAT080081.2	2.74516	0.0888858	30.8841	4,94879344934555	3.33496e-06
NONHSAT001407.2	0.569492	0.0184402	30.8832	4,94875099528711	0.000378171
ENST00000625390	0.748658	0.0242416	30.8832	4,94875099528711	0.000378171
NONHSAT114382.2	3.46542	0.11221	30.8832	4,94875099528711	0.000378171
NONHSAT171710.1	1.11135	0.0359856	30.8832	4,94875099528711	0.000378171
NONHSAT183939.1	8.86909	0.289758	30.6086	4,93586433725229	1.6545e-12
NONHSAT102747.2	0.304552	0.01	30.4552	4,92861537674642	2.21027e-05
NONHSAT199257.1	0.661576	0.022	30.0716	4,91033192276684	4.36526e-06
ENST00000559334	1.92755	0.0640986	30.0716	4,91033192276684	4.36526e-06
NONHSAT219210.1	1.44469	0.0480415	30.0716	4,91033192276683	4.36526e-06
NONHSAT175146.1	0.300007	0.01	30.0007	4,90692192465266	1.26463e-07
ENST00000581471	4.17251	0.140036	29.7961	4,89705040955771	2.52201e-10
NONHSAT220508.1	0.297154	0.01	29.7154	4,89313888767895	0.00292486
NONHSAT050203.2	0.29709	0.01	29.709	4,89282932662775	0.00487477
NONHSAT211961.1	1.7242	0.0582926	29.5783	4,88646835452559	1.05922e-09
NONHSAT162640.1	0.295222	0.01	29.5222	4,88373041230603	0.000272943
NONHSAT107061.2	0.571735	0.019541	29.2583	4,8707720690281	0.000555241
NONHSAT207212.1	0.269084	0.00919686	29.2583	4,87077206902809	0.000555241
NONHSAT158730.1	1.1544	0.0394555	29.2583	4,87077206902809	0.000555241
NONHSAT123304.2	6.39974	0.218733	29.2583	4,87077206902809	0.000555241
ENST00000597983	0.464929	0.0158905	29.2583	4,87077206902809	0.000555241
NONHSAT217065.1	0.482705	0.0164981	29.2583	4,87077206902809	0.000555241
NONHSAT013779.2	3.43748	0.117488	29.2583	4,87077206902809	0.000555241
ENST00000455485	1.0918	0.0373264	29.2501	4,8703718662249	2.58226e-07
NONHSAT006485.2	1.97549	0.0675379	29.2501	4,8703718662249	2.58226e-07
NONHSAT184699.1	0.290517	0.01	29.0517	4,86055235149434	0.000428911
NONHSAT211959.1	0.288388	0.01	28.8388	4,84994144051913	0.000681211
NONHSAT082454.2	0.285123	0.01	28.5123	4,83351350132962	0.00487477
NONHSAT123379.2	0.503986	0.0177174	28.4458	4,83014288805793	7.55886e-06
ENST00000554530	2.14997	0.0755812	28.4458	4,83014288805793	7.55886e-06
NONHSAT080613.2	1.07072	0.0376408	28.4458	4,83014288805793	7.55886e-06
NONHSAT118607.2	0.281983	0.01	28.1983	4,81753839876387	0.000681211
ENST00000366185	3.7742	0.133996	28.1666	4,8159114429734	3.96988e-07
NONHSAT151864.1	0.281017	0.01	28.1017	4,81258631749561	0.00292486
NONHSAT006999.2	1.96076	0.0701441	27.9533	4,80494650839496	2.25752e-09
NONHSAT105420.2	0.278963	0.01	27.8963	4,80200016913922	0.000428911
NONHSAT182013.1	1.10498	0.0399874	27.6333	4,78833626891529	0.000820847
ENST00000617955	1.95472	0.0707377	27.6333	4,78833626891529	0.000820847
ENST00000605923	0.500235	0.0181026	27.6333	4,78833626891529	0.000820847
ENST00000602900	2.0494	0.0741641	27.6333	4,78833626891529	0.000820847
NONHSAT005303.2	2.5272	0.0914547	27.6333	4,78833626891529	0.000820847
NONHSAT208883.1	1.49387	0.0540604	27.6333	4,78833626891529	0.000820847
NONHSAT107560.2	0.450417	0.0162998	27.6333	4,78833626891529	0.000820847
NONHSAT152100.1	2.40663	0.0870918	27.6333	4,78833626891529	0.000820847
NONHSAT135646.2	1.72581	0.062454	27.6333	4,78833626891529	0.000820847
NONHSAT184740.1	1.36484	0.0493913	27.6333	4,78833626891529	0.000820847
ENST00000424895	0.672968	0.0243535	27.6333	4,78833626891529	0.000820847
ENST00000450287	0.397459	0.0143833	27.6333	4,78833626891529	0.000820847
NONHSAT196512.1	1.78451	0.0645782	27.6333	4,78833626891529	0.000820847
NONHSAT199071.1	1.98529	0.0718655	27.6251	4,78790619139209	4.93898e-07
NONHSAT094715.2	0.274339	0.01	27.4339	4,77788819181084	0.000113897
NONHSAT144472.2	0.273582	0.01	27.3582	4,77389951519027	0.00109407
ENST00000532315	4.39936	0.161619	27.2205	4,76662305166692	7.66506e-08
NONHSAT193897.1	7.66172	0.282853	27.0873	4,75954541923622	1.08034e-09
NONHSAT033297.2	1.39972	0.0516827	27.083	4,75931426411521	6.15892e-07
NONHSAT144076.2	1.31705	0.0486301	27.083	4,75931426411521	6.15892e-07
ENST00000582957	0.26827	0.01	26.827	4,74561166486686	0.00487477
NONHSAT182550.1	1.51373	0.0564388	26.8208	4,7452819250454	1.32827e-05
ENST00000616608	1.82056	0.0678951	26.8144	4,74493491216133	9.2128e-08
NONHSAT155772.1	4.21502	0.157861	26.7008	4,73881266938198	4.49448e-10
ENST00000309874	0.266049	0.01	26.6049	4,73362244040386	0.00487477
NONHSAT149594.1	3.73937	0.140888	26.5415	4,73017713698381	9.64584e-07
ENST00000544868	18.1633	0.692286	26.2366	4,71350977425097	5.74447e-10
NONHSAT121050.2	0.260745	0.01	26.0745	4,70456564411224	3.28845e-05
NONHSAT079853.2	0.713989	0.0274523	26.0084	4,70090308217832	0.00122209
NONHSAT196272.1	1.84803	0.0710554	26.0084	4,70090308217832	0.00122209
NONHSAT182777.1	5.2088	0.200274	26.0084	4,70090308217832	0.00122209
NONHSAT160843.1	1.7314	0.0665708	26.0084	4,70090308217832	0.00122209
ENST00000610036	0.357926	0.013762	26.0084	4,70090308217832	0.00122209
NONHSAT051821.2	0.874282	0.0336154	26.0084	4,70090308217832	0.00122209
ENST00000609843	4.14257	0.159279	26.0084	4,70090308217832	0.00122209
NONHSAT015137.2	1.31189	0.050441	26.0084	4,70090308217832	0.00122209
NONHSAT106513.2	0.362326	0.0139316	26.0074	4,70085266914291	1.77089e-05
ENST00000467865	0.674007	0.0259159	26.0074	4,70085266914291	1.77089e-05
NONHSAT199202.1	2.35581	0.0905821	26.0074	4,70085266914291	1.77089e-05
NONHSAT087199.2	1.56655	0.0602348	26.0074	4,7008526691429	1.77089e-05
NONHSAT010010.2	1.03387	0.0397529	26.0074	4,7008526691429	1.77089e-05
NONHSAT198759.1	4.14243	0.159279	26.0074	4,7008526691429	1.77089e-05
NONHSAT182499.1	0.256924	0.01	25.6924	4,68327086574901	0.00487477
ENST00000623124	5.1882	0.205922	25.195	4,6550636157538	2.37033e-05
NONHSAT026265.2	4.09251	0.165133	24.7832	4,63128975072818	2.37008e-07
ENST00000608826	0.24755	0.01	24.755	4,62964843030237	2.21027e-05
NONHSAT213834.1	2.17336	0.0891362	24.3825	4,60777351278407	4.29873e-05
NONHSAT155813.1	2.54906	0.104548	24.3816	4,60771973806536	0.00183262
NONHSAT160101.1	1.52273	0.062454	24.3816	4,60771973806536	0.00183262
NONHSAT015165.2	1.0116	0.0414904	24.3816	4,60771973806535	0.00183262
NONHSAT202263.1	0.321733	0.0131957	24.3816	4,60771973806535	0.00183262
NONHSAT122587.2	0.929536	0.0381245	24.3816	4,60771973806535	0.00183262
ENST00000448624	1.43227	0.0587438	24.3816	4,60771973806535	0.00183262
NONHSAT010288.2	2.84049	0.116514	24.379	4,60756613208367	1.58066e-09
NONHSAT035183.2	0.240465	0.01	24.0465	4,58775242103704	4.93267e-05
NONHSAT160770.1	0.239712	0.01	23.9712	4,58323180817838	0.000428911
NONHSAT063955.2	5.27692	0.223892	23.5691	4,55882497218977	5.82553e-05
NONHSAT082397.2	0.771523	0.0327345	23.5691	4,55882497218977	5.82553e-05
NONHSAT031956.2	0.234404	0.01	23.4404	4,55092569420223	0.000681211
NONHSAT124030.2	1.87984	0.0814576	23.0775	4,52841434191649	1.06492e-07
NONHSAT168342.1	0.228262	0.01	22.8262	4,51261624454685	7.46224e-05
NONHSAT105953.2	0.247172	0.0108616	22.7566	4,50821479317057	0.00276842
NONHSAT118629.2	1.90166	0.0835652	22.7566	4,50821479317057	0.00276842
NONHSAT056622.2	1.45965	0.0641419	22.7566	4,50821479317057	0.00276842
NONHSAT061530.2	0.134782	0.00592276	22.7566	4,50821479317057	0.00276842
NONHSAT004852.2	0.212084	0.00931966	22.7566	4,50821479317057	0.00276842
NONHSAT107548.2	0.367896	0.0161666	22.7566	4,50821479317057	0.00276842
NONHSAT183325.1	0.570599	0.025074	22.7566	4,50821479317057	0.00276842
NONHSAT023682.2	0.62799	0.0275959	22.7566	4,50821479317057	0.00276842
NONHSAT196046.1	1.18828	0.0522167	22.7566	4,50821479317057	0.00276842
NONHSAT042403.2	1.05793	0.0464887	22.7566	4,50821479317057	0.00276842
NONHSAT049662.2	0.520802	0.0228857	22.7566	4,50821479317057	0.00276842
NONHSAT182048.1	0.68537	0.0301174	22.7566	4,50821479317057	0.00276842
NONHSAT123535.2	0.428288	0.0188204	22.7566	4,50821479317057	0.00276842
ENST00000620744	3.32352	0.146046	22.7566	4,50821479317056	0.00276842
NONHSAT213755.1	4.13848	0.181858	22.7566	4,50821479317056	0.00276842
NONHSAT198285.1	0.749059	0.0329161	22.7566	4,50821479317056	0.00276842
NONHSAT010319.2	0.176177	0.00774181	22.7566	4,50821479317056	0.00276842
NONHSAT113763.2	0.448006	0.0196869	22.7566	4,50821479317056	0.00276842
NONHSAT215510.1	0.372463	0.0163672	22.7566	4,50821479317056	0.00276842
NONHSAT134556.2	1.13104	0.0497016	22.7566	4,50821479317056	0.00276842
MSTRG.19406.1	3.02986	0.133162	22.7532	4,50799973838282	1.28309e-08
ENST00000564352	4.07892	0.17927	22.7529	4,50798006072234	4.14035e-11
NONHSAT160839.1	2.57791	0.113302	22.7526	4,50795673127186	1.26491e-07
NONHSAT179933.1	10.5954	0.468264	22.627	4,49997082696693	1.25787e-10
NONHSAT044052.2	0.225312	0.01	22.5312	4,49385480711559	0.000175464
ENST00000522525	2.85141	0.127138	22.4276	4,48720485116109	1.50462e-07
NONHSAT119906.2	7.60502	0.339447	22.4041	4,48569265781668	9.73433e-11
NONHSAT169395.1	0.222381	0.01	22.2381	4,4749631045908	0.000272943
NONHSAT178519.1	2.31574	0.104273	22.2084	4,47303053951443	6.4296e-06
NONHSAT058976.2	1.15323	0.0519276	22.2084	4,47303053951443	6.4296e-06
ENST00000625169	0.647547	0.0295089	21.9441	4,45576444446925	0.000108391
ENST00000437007	1.11877	0.0509828	21.9441	4,45576444446925	0.000108391
ENST00000397057	0.800907	0.0365057	21.9392	4,45544187430784	9.60387e-07
ENST00000501448	0.216058	0.01	21.6058	4,43334720672009	0.00487477
NONHSAT026975.2	3.53557	0.16593	21.3076	4,41329509257692	2.54934e-09
ENST00000539391	0.444599	0.0210395	21.1317	4,40133504458248	0.00421342
NONHSAT130285.2	0.414298	0.0196055	21.1317	4,40133504458248	0.00421342
NONHSAT066216.2	0.589662	0.0279042	21.1317	4,40133504458248	0.00421342
ENST00000607565	0.504281	0.0238638	21.1317	4,40133504458248	0.00421342
NONHSAT052714.2	1.55265	0.0734752	21.1317	4,40133504458247	0.00421342
NONHSAT013859.2	1.81706	0.0859873	21.1317	4,40133504458247	0.00421342
NONHSAT085114.2	0.302477	0.0143139	21.1317	4,40133504458247	0.00421342
NONHSAT219440.1	0.908528	0.0429937	21.1317	4,40133504458247	0.00421342
NONHSAT223590.1	4.99012	0.236144	21.1317	4,40133504458247	0.00421342
NONHSAT080633.2	0.216354	0.0102384	21.1317	4,40133504458247	0.00421342
NONHSAT048003.2	0.53781	0.0254504	21.1317	4,40133504458247	0.00421342
NONHSAT185468.1	0.60205	0.0284904	21.1317	4,40133504458247	0.00421342
ENST00000625080	0.367136	0.0173737	21.1317	4,40133504458247	0.00421342
NONHSAT192140.1	0.831687	0.0393574	21.1317	4,40133504458247	0.00421342
ENST00000566440	0.512527	0.024254	21.1317	4,40133504458247	0.00421342
NONHSAT220074.1	1.75659	0.0831261	21.1317	4,40133504458247	0.00421342
ENST00000614284	1.92517	0.0911037	21.1317	4,40133504458247	0.00421342
ENST00000457239	2.12954	0.100775	21.1317	4,40133504458247	0.00421342
ENST00000607148	2.09827	0.0992992	21.1308	4,40127299718591	0.000148847
NONHSAT113481.2	0.806572	0.0381705	21.1308	4,40127299718591	0.000148847
ENST00000616950	1.15683	0.0547463	21.1308	4,40127299718591	0.000148847
NONHSAT181719.1	9.14577	0.432876	21.1279	4,40107862516019	3.31725e-08
ENST00000415513	7.32115	0.346522	21.1275	4,40105216404536	3.66395e-07
ENST00000502457	5.29561	0.250652	21.1273	4,40103975456605	1.51503e-09
ENST00000606154	7.80967	0.371427	21.0261	4,39411157428598	1.43908e-10
NONHSAT219236.1	5.32986	0.254732	20.9234	4,38704677810571	6.80207e-09
NONHSAT131861.2	9.38879	0.448993	20.9108	4,38617541549229	2.01457e-10
NONHSAT220395.1	48.1241	2.30224	20.9032	4,3856499150842	8.61917e-12
NONHSAT202107.1	1.16796	0.0563676	20.7203	4,37297619947504	1.80219e-06
NONHSAT002186.2	11.2763	0.547755	20.5863	4,36361589383665	4.5985e-08
NONHSAT026890.2	1.55948	0.0757646	20.5833	4,36340087110119	1.37134e-05
NONHSAT092438.2	2.78599	0.136355	20.4319	4,3527496141608	1.88523e-08
ENST00000586611	11.9775	0.588028	20.369	4,34830251700966	3.18916e-10
NONHSAT152175.1	0.500341	0.0246252	20.3183	4,34470684235957	0.000205346
NONHSAT194545.1	0.549207	0.0270302	20.3183	4,34470684235957	0.000205346
ENST00000456342	2.97657	0.146497	20.3183	4,34470684235957	0.000205346
NONHSAT009703.2	4.96481	0.244387	20.3154	4,34450254251557	1.01296e-09
NONHSAT076559.2	0.825515	0.0406382	20.3137	4,34438427219816	2.23231e-06
ENST00000515544	1.87994	0.0925451	20.3137	4,34438427219816	2.23231e-06
NONHSAT094763.2	0.201261	0.01	20.1261	4,33099522247848	0.00109407
NONHSAT034596.2	0.201128	0.01	20.1128	4,33004035569732	4.8641e-06
NONHSAT102535.2	0.200714	0.01	20.0714	4,32706700453241	0.00487477
NONHSAT055310.2	15.002	0.753581	19.9076	4,31524714506677	1.3174e-08
NONHSAT216519.1	3.9545	0.198643	19.9076	4,31524714506676	3.44761e-06
NONHSAT124780.2	1.54306	0.0775112	19.9076	4,31524714506676	3.44761e-06
NONHSAT181204.1	0.196421	0.01	19.6421	4,29588041099147	0.00487477
ENST00000499900	1.0575	0.0542147	19.5058	4,28583197440494	0.000284623
NONHSAT190864.1	3.4611	0.177439	19.5058	4,28583197440493	0.000284623
NONHSAT091079.2	1.8376	0.0942218	19.5029	4,2856169196172	8.97813e-08
NONHSAT037652.2	1.13321	0.058114	19.4997	4,28537949078374	2.30706e-05
NONHSAT027134.2	4.35847	0.228248	19.0953	4,25514576632281	5.3728e-06
NONHSAT163711.1	3.7195	0.196195	18.9582	4,24475030981358	3.00661e-05
NONHSAT066164.2	1.05154	0.0554663	18.9582	4,24475030981357	3.00661e-05
NONHSAT219211.1	1.79066	0.0952142	18.8066	4,23316777208373	6.29209e-08
NONHSAT170554.1	13.2825	0.70631	18.8055	4,2330855718363	1.43404e-09
NONHSAT024809.2	1.77456	0.09493	18.6933	4,22445188717854	0.000396399
NONHSAT211955.1	0.609186	0.0325884	18.6933	4,22445188717854	0.000396399
MSTRG.33851.1	2.37873	0.127271	18.6902	4,22421345243827	1.50462e-07
ENST00000433214	7.46969	0.401008	18.6273	4,21934517631588	7.69402e-11
NONHSAT160778.1	0.242196	0.0131509	18.4167	4,20294369067094	3.93101e-05
ENST00000595302	1.23156	0.0668721	18.4167	4,20294369067094	3.93101e-05
NONHSAT055259.2	1.60246	0.0870113	18.4167	4,20294369067093	3.93101e-05
NONHSAT209918.1	1.73724	0.0943295	18.4167	4,20294369067093	3.93101e-05
NONHSAT219139.1	2.3654	0.128438	18.4167	4,20294369067093	3.93101e-05
ENST00000467903	9.46022	0.517407	18.2839	4,19250303403395	4.85296e-09
ENST00000618199	5.9046	0.322963	18.2826	4,19239551866028	8.45168e-06
NONHSAT116046.2	0.182699	0.01	18.2699	4,19139322393316	0.000681211
NONHSAT206996.1	0.179347	0.01	17.9347	4,16468479336826	0.00292486
NONHSAT178269.1	0.173039	0.00967785	17.8799	4,1602705384648	0.000554765
ENST00000500941	2.31878	0.129686	17.8799	4,1602705384648	0.000554765
ENST00000617791	10.7702	0.602456	17.8771	4,16004180828054	2.45328e-06
NONHSAT135770.2	1.84901	0.103433	17.8764	4,15998463285328	1.06385e-05
ENST00000465075	4.41453	0.246947	17.8764	4,15998463285327	1.06385e-05
NONHSAT204830.1	1.53103	0.0856509	17.8752	4,15988934680105	5.15666e-05
NONHSAT211537.1	1.05647	0.0591027	17.8752	4,15988934680105	5.15666e-05
NONHSAT088505.2	1.19259	0.0673927	17.6961	4,14535798119207	3.44322e-08
NONHSAT202736.1	3.64026	0.207398	17.552	4,13356335040051	2.0853e-08
NONHSAT057072.2	2.21309	0.12913	17.1385	4,09917265722299	1.88156e-08
NONHSAT162596.1	0.17084	0.01	17.084	4,09457607981444	0.000272943
ENST00000572223	2.2503	0.131847	17.0675	4,09317729389173	0.000780248
ENST00000554614	0.531218	0.0311246	17.0675	4,09317729389172	0.000780248
ENST00000383808	0.854093	0.0500422	17.0675	4,09317729389172	0.000780248
ENST00000430983	0.473056	0.0277168	17.0675	4,09317729389172	0.000780248
NONHSAT108154.2	3.99068	0.233818	17.0675	4,09317729389172	0.000780248
ENST00000560395	3.67396	0.215261	17.0675	4,09317729389172	0.000780248
NONHSAT177677.1	0.180365	0.0105677	17.0675	4,09317729389172	0.000780248
NONHSAT156831.1	2.16221	0.126705	17.0649	4,09296223910399	5.28778e-07
NONHSAT179932.1	16.0065	0.938024	17.0641	4,09289056129794	2.07514e-09
ENST00000403909	2.19988	0.128922	17.0637	4,09285472373031	1.69819e-05
NONHSAT066071.2	1.58576	0.0938211	16.902	4,07911786443169	4.49337e-06
ENST00000579126	4.38947	0.259702	16.902	4,07911786443169	4.49337e-06
ENST00000589950	5.54965	0.333162	16.6575	4,05810054759738	2.15372e-05
NONHSAT090916.2	5.37977	0.322963	16.6575	4,05810054759738	2.15372e-05
NONHSAT018233.2	1.67001	0.102738	16.255	4,02281101206291	0.00110289
NONHSAT185697.1	0.618224	0.0380329	16.255	4,02281101206291	0.00110289
NONHSAT173603.1	2.87889	0.177108	16.255	4,02281101206291	0.00110289
NONHSAT219607.1	0.213991	0.0131646	16.255	4,0228110120629	0.00110289
NONHSAT221214.1	13.4543	0.827865	16.2518	4,02252736381	4.88533e-10
NONHSAT071769.2	2.82197	0.173641	16.2517	4,0225206855735	6.79162e-06
NONHSAT155865.1	1.85022	0.11385	16.2514	4,02248844190151	2.73853e-05
NONHSAT211670.1	1.4866	0.0914752	16.2514	4,0224884419015	2.73853e-05
NONHSAT164232.1	0.311232	0.0191525	16.2501	4,02238093453971	0.00015802
ENST00000400385	1.32561	0.0826022	16.0481	4,00432680084135	2.34075e-07
ENST00000624834	1.2007	0.0757791	15.8448	3,98593361050768	3.49132e-05
ENST00000429315	0.157522	0.01	15.7522	3,97748256674218	0.00487477
NONHSAT178652.1	0.157361	0.01	15.7361	3,97601057902047	0.00487477
NONHSAT182520.1	0.952903	0.0606633	15.7081	3,97343239394541	0.000210936
NONHSAT099877.2	0.973212	0.0619563	15.7081	3,97343239394541	0.000210936
NONHSAT007151.2	2.04704	0.130318	15.7081	3,97343239394541	0.000210936
NONHSAT150397.1	8.46808	0.542761	15.6019	3,96364581761886	1.59327e-08
NONHSAT200277.1	0.155949	0.01	15.5949	3,96299791045837	0.00292486
ENST00000624177	17.8504	1.14719	15.5601	3,95978279966376	2.27002e-10
NONHSAT190862.1	1.57621	0.102075	15.4416	3,94875099528712	0.00156686
ENST00000624533	0.638724	0.0413638	15.4416	3,94875099528711	0.00156686
NONHSAT169197.1	1.74094	0.112743	15.4416	3,94875099528711	0.00156686
ENST00000610542	2.02749	0.1313	15.4416	3,94875099528711	0.00156686
ENST00000508651	8.11384	0.525521	15.4396	3,94856424334381	1.65411e-06
NONHSAT183265.1	0.363255	0.023529	15.4386	3,94847087918414	4.46298e-05
NONHSAT055477.2	3.97806	0.25767	15.4386	3,94847087918414	4.46298e-05
ENST00000607215	0.960311	0.0622019	15.4386	3,94847087918414	4.46298e-05
NONHSAT171990.1	6.45504	0.420305	15.358	3,94091613854796	6.52817e-09
NONHSAT132841.2	0.721784	0.0472467	15.2769	3,93328217969815	1.58967e-05
NONHSAT208275.1	1.20283	0.0793082	15.1666	3,92282221492621	0.000282602
NONHSAT212489.1	7.61084	0.505029	15.0701	3,91361673137597	1.12848e-07
NONHSAT142716.2	1.10562	0.0735486	15.0325	3,91000935260542	5.7206e-05
NONHSAT193446.1	22.7806	1.52076	14.9797	3,90494113099432	4.22618e-10
NONHSAT202317.1	14.7263	0.984927	14.9516	3,90223066032158	1.97657e-05
NONHSAT188349.1	2.28813	0.153984	14.8595	3,89331341244749	1.2596e-06
NONHSAT202533.1	15.0456	1.01947	14.7582	3,8834497457427	1.14619e-09
NONHSAT182278.1	8.73322	0.592949	14.7284	3,88053338431684	2.76542e-08
NONHSAT136726.2	2.43213	0.166252	14.6291	3,8707720690281	0.00223741
NONHSAT203426.1	0.293976	0.0200953	14.6291	3,8707720690281	0.00223741
NONHSAT025984.2	1.12814	0.0771162	14.6291	3,8707720690281	0.00223741
NONHSAT033243.2	0.351225	0.0240086	14.6291	3,8707720690281	0.00223741
ENST00000623938	0.388243	0.026539	14.6291	3,87077206902809	0.00223741
ENST00000617777	0.544392	0.0372129	14.6291	3,87077206902809	0.00223741
NONHSAT194343.1	0.356362	0.0243598	14.6291	3,87077206902809	0.00223741
NONHSAT076309.2	1.28707	0.0879796	14.6291	3,87077206902809	0.00223741
ENST00000573447	1.24328	0.0849866	14.6291	3,87077206902809	0.00223741
NONHSAT150099.1	1.7579	0.120165	14.6291	3,87077206902809	0.00223741
NONHSAT203418.1	3.31713	0.226777	14.6273	3,87058688896036	2.99596e-06
NONHSAT108146.2	2.9274	0.200141	14.6267	3,87053193203562	2.46296e-05
NONHSAT171989.1	4.13319	0.282586	14.6263	3,87049529474304	4.29678e-07
NONHSAT179947.1	0.349172	0.0238749	14.6251	3,8703718662249	0.000380023
NONHSAT153043.1	1.91115	0.130677	14.6251	3,87037186622489	0.000380023
NONHSAT189037.1	0.146007	0.01	14.6007	3,86796265612423	0.000175464
NONHSAT196371.1	0.145049	0.01	14.5049	3,85847012178787	0.000681211
ENST00000538304	1.89574	0.13205	14.3562	3,84359842181228	3.66556e-06
ENST00000624112	3.33804	0.232917	14.3314	3,84111124282492	2.12482e-07
NONHSAT060062.2	3.69399	0.258289	14.3018	3,83812104622861	3.07576e-05
NONHSAT224425.1	1.09686	0.0766939	14.3018	3,83812104622861	3.07576e-05
NONHSAT121869.2	6.09886	0.431725	14.1267	3,82035403732551	5.73386e-09
ENST00000560446	7.59827	0.539536	14.083	3,81588041894156	0.00051295
MSTRG.21555.2	4.12348	0.293568	14.0461	3,81209740713885	8.93631e-08
ENST00000579651	7.03083	0.503588	13.9615	3,80337742811535	1.85585e-08
MSTRG.3899.1	4.56828	0.328764	13.8953	3,79652757694588	2.78314e-08
NONHSAT160437.1	1.39385	0.100882	13.8167	3,7883362689153	0.00321129
NONHSAT007398.2	0.519863	0.0376258	13.8167	3,78833626891529	0.00321129
ENST00000596259	1.65817	0.120013	13.8167	3,78833626891529	0.00321129
NONHSAT152997.1	0.0467899	0.00338649	13.8167	3,78833626891529	0.00321129
NONHSAT202102.1	1.06896	0.0773676	13.8167	3,78833626891528	0.00321129
ENST00000590353	3.64844	0.26412	13.8136	3,78801369875388	0.000122507
ENST00000537821	9.48727	0.686808	13.8136	3,78801369875388	1.37229e-06
NONHSAT094196.2	1.90382	0.138978	13.6987	3,77596756991761	3.14035e-06
NONHSAT091152.2	11.7624	0.858705	13.6978	3,77587541143018	7.66092e-10
NONHSAT179838.1	2.91406	0.21346	13.6515	3,77099113710565	4.82892e-05
ENST00000362348	9.73102	0.712815	13.6515	3,77099113710565	4.82892e-05
NONHSAT132843.2	1.03756	0.0766205	13.5415	3,75931426411522	0.000695001
NONHSAT175508.1	1.84752	0.136434	13.5415	3,75931426411522	0.000695001
NONHSAT092782.2	0.293088	0.0216437	13.5415	3,75931426411522	0.000695001
NONHSAT151924.1	0.529894	0.0391312	13.5415	3,75931426411522	0.000695001
NONHSAT090244.2	3.22544	0.23819	13.5415	3,75931426411522	0.000695001
NONHSAT208359.1	2.85758	0.213134	13.4074	3,744959354884	0.00015881
ENST00000620563	4.6125	0.344026	13.4074	3,74495935488399	0.00015881
NONHSAT202743.1	0.133892	0.01	13.3892	3,74300066010487	0.000175464
NONHSAT150379.1	5.70126	0.426224	13.3762	3,74159584129054	2.3979e-07
NONHSAT170770.1	3.59705	0.271011	13.2727	3,73039215971927	8.37472e-06
NONHSAT077995.2	1.63942	0.123518	13.2727	3,73039215971927	8.37472e-06
NONHSAT203495.1	0.483873	0.0364562	13.2727	3,73039215971927	8.37472e-06
ENST00000524376	21.3293	1.60958	13.2514	3,72807555165712	8.52533e-10
NONHSAT115106.2	5.19158	0.391876	13.248	3,72770262597123	4.81887e-10
NONHSAT169047.1	3.61356	0.273046	13.2342	3,72620254215729	4.57623e-06
NONHSAT211883.1	0.332449	0.0251777	13.2041	3,72291575067003	2.71212e-06
ENST00000415434	2.15443	0.165672	13.0042	3,70090308217833	0.00463264
ENST00000606067	2.77413	0.213326	13.0042	3,70090308217832	0.00463264
NONHSAT018345.2	3.95669	0.304263	13.0042	3,70090308217832	0.00463264
NONHSAT204912.1	4.93795	0.37972	13.0042	3,70090308217832	0.00463264
ENST00000447107	0.836373	0.0643157	13.0042	3,70090308217832	0.00463264
ENST00000561559	0.647345	0.0497798	13.0042	3,70090308217832	0.00463264
NONHSAT177358.1	2.46405	0.189481	13.0042	3,70090308217832	0.00463264
ENST00000607100	0.551356	0.0423984	13.0042	3,70090308217832	0.00463264
NONHSAT027901.2	2.08421	0.160298	13.0021	3,70067553647515	5.53794e-06
NONHSAT094370.2	3.10609	0.238891	13.0021	3,70067553647514	5.53794e-06
ENST00000607513	2.56822	0.197555	13	3,70043939616058	0.000945269
NONHSAT174143.1	1.12223	0.0863257	13	3,70043939616058	0.000945269
ENST00000607307	1.21582	0.0935243	13	3,70043939616058	0.000945269
NONHSAT173094.1	5.76057	0.448982	12.8303	3,68148094175559	1.00971e-07
NONHSAT123398.2	22.9638	1.79087	12.8227	3,68062594645712	3.62708e-10
NONHSAT178124.1	1.54861	0.122165	12.6764	3,66407002388302	9.66422e-05
ENST00000364711	9.46213	0.746439	12.6764	3,66407002388302	9.66422e-05
ENST00000572790	12.1912	0.964492	12.6401	3,65993115402183	2.36383e-06
NONHSAT212442.1	3.92413	0.311571	12.5947	3,65474104559239	4.58654e-06
NONHSAT160776.1	0.262657	0.0208547	12.5947	3,65474104559239	0.000269237
NONHSAT133801.2	7.53403	0.6009	12.5379	3,64822518777383	8.15141e-06
NONHSAT002190.2	5.2115	0.418256	12.4601	3,63923926159876	1.97657e-05
NONHSAT106825.2	6.40621	0.514149	12.4598	3,63921355216528	1.03953e-07
NONHSAT182562.1	0.317069	0.0254479	12.4595	3,63917927391106	2.77928e-06
NONHSAT208774.1	1.37137	0.110075	12.4585	3,63905930893418	0.00129061
ENST00000577544	2.89961	0.232741	12.4585	3,63905930893418	0.00129061
NONHSAT055100.2	1.05503	0.0846834	12.4585	3,63905930893418	0.00129061
NONHSAT202519.1	15.4383	1.24314	12.4188	3,63445483652101	6.05614e-09
NONHSAT204858.1	12.5951	1.01439	12.4164	3,63417806730005	4.19697e-08
NONHSAT122778.2	17.4632	1.40922	12.3922	3,63135716332889	2.85834e-07
ENST00000506314	0.872569	0.0706451	12.3514	3,62660729255948	0.000122363
NONHSAT118802.2	0.963784	0.0780301	12.3514	3,62660729255948	0.000122363
NONHSAT215956.1	1.70346	0.138437	12.3049	3,62115978132343	5.26056e-07
NONHSAT212304.1	14.1769	1.15717	12.2514	3,6148708060147	1.73682e-08
NONHSAT185104.1	5.693	0.470562	12.0983	3,59673388779223	3.85618e-06
ENST00000465501	1.93069	0.159912	12.0734	3,59376476452234	1.20816e-05
NONHSAT219214.1	1.84204	0.15257	12.0734	3,59376476452234	1.20816e-05
NONHSAT088456.2	13.4964	1.12633	11.9826	3,58287109554697	6.22354e-09
NONHSAT182507.1	3.36116	0.282012	11.9185	3,57512964750579	3.07576e-05
NONHSAT119833.2	1.61652	0.135655	11.9164	3,57487796022045	0.0017689
NONHSAT169043.1	2.72447	0.228632	11.9164	3,57487796022045	0.0017689
NONHSAT013017.2	0.335112	0.0281219	11.9164	3,57487796022045	0.0017689
NONHSAT051155.2	1.90713	0.160042	11.9164	3,57487796022044	0.0017689
NONHSAT151355.1	1.08526	0.0910726	11.9164	3,57487796022044	0.0017689
NONHSAT035114.2	3.46397	0.290689	11.9164	3,57487796022044	0.0017689
NONHSAT010657.2	16.7448	1.41019	11.8741	3,56974753546872	2.1988e-09
ENST00000523602	2.80378	0.237973	11.7819	3,55850240202836	0.0006078
ENST00000518201	4.29446	0.364496	11.7819	3,55850240202836	0.0006078
NONHSAT168062.1	0.192036	0.0162992	11.7819	3,55850240202836	0.0006078
NONHSAT217617.1	0.117573	0.01	11.7573	3,55548450964099	0.000681211
NONHSAT150262.1	5.68593	0.484433	11.7373	3,55302658679533	6.36161e-06
NONHSAT216409.1	1.7793	0.152061	11.7012	3,54858591224202	0.000197582
NONHSAT016928.2	22.4882	1.93404	11.6276	3,53947682398168	5.34974e-09
ENST00000434786	17.7238	1.52857	11.595	3,53542692925766	1.73796e-08
ENST00000617352	33.9593	2.93273	11.5794	3,53349031852659	1.08513e-08
NONHSAT084775.2	1.00437	0.0873948	11.4923	3,5225967154813	1.35307e-06
ENST00000624364	6.86281	0.599091	11.4554	3,51795270513946	3.02996e-08
NONHSAT097074.2	0.768968	0.067592	11.3766	3,50799973838283	4.82892e-05
NONHSAT130049.2	5.50583	0.483967	11.3765	3,50798018953709	3.80117e-06
NONHSAT176486.1	7.52952	0.66185	11.3765	3,50798018953709	3.80117e-06
ENST00000560711	1.49853	0.131724	11.3763	3,50795673127186	0.000251992
NONHSAT135354.2	1.08183	0.0950968	11.3761	3,50792806057677	8.93924e-06
NONHSAT213835.1	3.2195	0.283014	11.3758	3,50789222300916	0.000802182
NONHSAT116009.2	3.13085	0.275221	11.3758	3,50789222300916	0.000802182
ENST00000559505	4.29908	0.377915	11.3758	3,50789222300916	1.36438e-05
ENST00000412068	0.788138	0.0692822	11.3758	3,50789222300916	0.000802182
NONHSAT200279.1	0.951249	0.0836206	11.3758	3,50789222300916	0.000802182
ENST00000623057	1.52347	0.133923	11.3758	3,50789222300915	0.000802182
NONHSAT182400.1	1.53867	0.135268	11.3749	3,50778471564737	0.00243379
NONHSAT123511.2	0.384666	0.0338171	11.3749	3,50778471564737	0.00243379
NONHSAT006793.2	4.69628	0.412862	11.3749	3,50778471564737	0.00243379
ENST00000406017	0.576179	0.0506534	11.3749	3,50778471564737	0.00243379
NONHSAT179797.1	4.1866	0.368056	11.3749	3,50778471564737	0.00243379
NONHSAT098526.2	2.24407	0.197282	11.3749	3,50778471564736	0.00243379
ENST00000479876	2.11516	0.18595	11.3749	3,50778471564736	0.00243379
NONHSAT013778.2	58.1919	5.14077	11.3197	3,50076328741316	6.60864e-09
NONHSAT204395.1	0.978139	0.0880744	11.1058	3,47324556224989	6.07128e-05
MSTRG.9139.1	6.7882	0.611229	11.1058	3,47324556224989	6.07128e-05
ENST00000630242	0.602011	0.0543279	11.0811	3,47002463061726	5.10958e-06
NONHSAT167247.1	1.22104	0.110192	11.0811	3,47002463061726	5.10958e-06
NONHSAT160840.1	4.64289	0.420119	11.0513	3,46615011212922	0.000322178
NONHSAT221353.1	1.42292	0.129715	10.9696	3,45544187430784	0.00106197
NONHSAT069627.2	0.937515	0.0854647	10.9696	3,45544187430784	0.00106197
NONHSAT081260.2	3.32242	0.302875	10.9696	3,45544187430784	0.00106197
NONHSAT171994.1	10.0636	0.917403	10.9696	3,45544187430784	0.00106197
NONHSAT220386.1	18.8714	1.7283	10.919	3,44877475553461	1.34334e-07
NONHSAT105020.2	22.812	2.08981	10.9158	3,4483506733326	2.7756e-08
ENST00000554058	5.31478	0.490551	10.8343	3,43753489163916	1.50393e-05
NONHSAT155561.1	1.15847	0.106935	10.8334	3,43741843381856	0.00336139
ENST00000551271	0.677089	0.0625	10.8334	3,43741843381856	0.00336139
NONHSAT013191.2	1.65567	0.15283	10.8334	3,43741843381856	0.00336139
NONHSAT177680.1	0.142693	0.0131716	10.8334	3,43741843381855	0.00336139
NONHSAT115180.2	0.279849	0.025832	10.8334	3,43741843381855	0.00336139
ENST00000560010	3.29719	0.304354	10.8334	3,43741843381855	0.00336139
NONHSAT163149.1	0.229626	0.0211961	10.8334	3,43741843381855	0.00336139
NONHSAT202530.1	22.8876	2.12006	10.7958	3,43239470129211	2.18104e-07
NONHSAT155814.1	76.2541	7.08231	10.7668	3,42852149318416	3.20633e-08
NONHSAT200463.1	0.550628	0.0513338	10.7264	3,42309576825933	0.000412938
NONHSAT172866.1	2.01911	0.188238	10.7264	3,42309576825933	0.000412938
ENST00000623157	1.14967	0.107644	10.6803	3,41687756041224	5.07183e-05
NONHSAT182114.1	5.8954	0.551989	10.6803	3,41687756041224	5.07183e-05
NONHSAT211882.1	0.585849	0.0549897	10.6538	3,41329509257691	1.79356e-05
NONHSAT217410.1	6.98134	0.660864	10.564	3,40107862516019	0.000234216
ENST00000624433	5.83136	0.552042	10.5632	3,40098145105635	2.91043e-05
NONHSAT176620.1	0.618355	0.0585396	10.563	3,4009504270245	0.0014102
ENST00000553648	0.425529	0.0402848	10.563	3,4009504270245	0.0014102
NONHSAT191076.1	3.37755	0.326013	10.3602	3,37297619947504	3.53152e-05
NONHSAT151950.1	2.66228	0.256972	10.3602	3,37297619947504	3.53152e-05
NONHSAT155855.1	1.18126	0.114217	10.3422	3,37047666578715	1.0896e-05
ENST00000437428	6.42378	0.624104	10.2928	3,36356439601394	4.02892e-06
NONHSAT152856.1	0.699825	0.0679933	10.2926	3,3635300648166	2.56157e-05
NONHSAT091166.2	1.0208	0.0991904	10.2913	3,36335841704276	0.00466002
NONHSAT160774.1	0.17738	0.0172359	10.2913	3,36335841704276	0.00466002
NONHSAT207280.1	2.08517	0.202614	10.2913	3,36335841704276	0.00466002
NONHSAT178231.1	0.423907	0.0411907	10.2913	3,36335841704276	0.00466002
ENST00000443338	2.69958	0.262316	10.2913	3,36335841704276	0.00466002
NONHSAT011233.2	0.27964	0.0271724	10.2913	3,36335841704275	0.00466002
ENST00000460498	4.31139	0.418934	10.2913	3,36335841704275	0.00466002
NONHSAT167192.1	0.360165	0.0349969	10.2913	3,36335841704275	0.00466002
NONHSAT101040.2	0.405722	0.0394236	10.2913	3,36335841704275	0.00466002
NONHSAT183824.1	0.101881	0.01	10.1881	3,34881041193419	0.00487477
NONHSAT074576.2	0.920236	0.0906023	10.1569	3,34438427219816	0.00187833
NONHSAT123383.2	2.13784	0.211415	10.112	3,33800305913447	3.06775e-05
ENST00000620864	1.12424	0.111386	10.0932	3,33530767034414	2.44827e-06
NONHSAT000540.2	3.34278	0.331751	10.0762	3,33287745896773	2.2739e-05
NONHSAT188354.1	1.05924	0.105123	10.0762	3,33287745896773	0.000683473
ENST00000416999	6.18025	0.613353	10.0762	3,33287745896773	0.000683473
NONHSAT162352.1	15.6366	1.55559	10.0519	3,32939268885665	6.20327e-07
NONHSAT024279.2	1.44542	0.144219	10.0224	3,32515436725794	0.000369395
NONHSAT190770.1	0.220117	0.0219626	10.0224	3,32515436725794	0.000369395
NONHSAT152123.1	0.864014	0.0862084	10.0224	3,32515436725794	0.000369395
NONHSAT161917.1	0.100134	0.01	10.0134	3,32385733784142	0.000428911
NONHSAT128024.2	5.84269	0.583822	10.0077	3,32303331346466	2.70916e-06
ENST00000555332	0.929809	0.0931327	9.9837	3,31957464989533	9.65315e-05
NONHSAT016936.2	4.02589	0.406698	9.89898	3,30727939955755	1.73807e-05
NONHSAT033305.2	19.2448	1.95158	9.86116	3,30175713432892	2.74718e-08
ENST00000623273	20.5434	2.09093	9.82497	3,29645282636044	2.37274e-07
NONHSAT003786.2	1.2241	0.125532	9.7513	3,28559451351921	0.000465368
NONHSAT185616.1	6.37311	0.653567	9.75128	3,28559126005197	2.38574e-05
ENST00000599952	2.00575	0.205691	9.75125	3,28558735599799	0.00114267
ENST00000431189	10.9533	1.12329	9.75104	3,28555679379783	3.68115e-06
NONHSAT216066.1	11.5729	1.18687	9.75079	3,28551870289551	1.2582e-05
ENST00000602323	3.89829	0.399795	9.75072	3,28550940424353	0.00250944
NONHSAT070090.2	1.17195	0.120191	9.75072	3,28550940424352	0.00250944
NONHSAT055460.2	0.0965017	0.01	9.65017	3,27055426087588	0.000428911
NONHSAT200572.1	4.00892	0.418892	9.5703	3,25856424328508	5.31516e-05
NONHSAT024790.2	4.8796	0.509869	9.5703	3,25856424328508	5.31516e-05
ENST00000423449	9.77425	1.02373	9.54765	3,2551457663228	9.5255e-05
ENST00000391437	2.77461	0.29101	9.53439	3,25314021334899	9.57648e-06
NONHSAT198948.1	31.7646	3.33475	9.52534	3,25177070608726	1.68181e-07
NONHSAT162685.1	0.565582	0.0594131	9.51949	3,25088386106337	0.000149748
NONHSAT219858.1	8.27047	0.871393	9.49109	3,24657333533618	1.5497e-06
ENST00000602435	8.06077	0.850246	9.48051	3,24496533254903	0.000587516
NONHSAT175661.1	0.658945	0.0695052	9.48051	3,24496533254903	0.000587516
NONHSAT194003.1	2.62426	0.276805	9.48051	3,24496533254903	0.000587516
NONHSAT165393.1	9.21292	0.973948	9.45936	3,2417424765309	6.39128e-07
ENST00000535639	1.89294	0.200819	9.42614	3,23666662987762	4.50317e-05
NONHSAT200667.1	2.89821	0.307471	9.42596	3,2366388154037	0.00148305
NONHSAT039798.2	2.17014	0.23023	9.42596	3,2366388154037	0.00148305
NONHSAT185617.1	6.08509	0.647164	9.4027	3,2330756135963	1.52469e-05
NONHSAT011828.2	2.23135	0.237636	9.38979	3,23109228718166	6.40257e-05
NONHSAT186577.1	0.0938277	0.01	9.38277	3,23001436419945	0.00292486
ENST00000428006	10.3976	1.11263	9.34512	3,22421345243827	2.48056e-05
NONHSAT200225.1	0.761286	0.0814682	9.34458	3,22412931701713	0.00336263
ENST00000433059	0.818901	0.0876338	9.34458	3,22412931701713	0.00336263
NONHSAT132734.2	0.484985	0.0519001	9.34458	3,22412931701713	0.00336263
ENST00000592499	3.36728	0.360346	9.34458	3,22412931701713	0.00336263
NONHSAT051133.2	1.44094	0.154204	9.34435	3,22409424694625	0.000116763
NONHSAT213168.1	0.529074	0.0566197	9.34435	3,22409424694625	0.000116763
NONHSAT219817.1	0.636826	0.0681509	9.34435	3,22409424694624	0.000116763
NONHSAT123200.2	15.1526	1.62523	9.32331	3,2208429252849	6.19531e-06
NONHSAT037487.2	4.11358	0.441477	9.31777	3,2199840076738	1.23412e-05
NONHSAT178647.1	0.526101	0.0565213	9.30802	3,2184735723421	3.86887e-05
ENST00000451350	2.05198	0.220942	9.28738	3,21527175536749	0.000187086
ENST00000623886	9.14411	0.989031	9.24552	3,20875411433853	5.41621e-07
ENST00000511543	3.93158	0.425782	9.23379	3,20692297595112	4.57413e-06
NONHSAT175753.1	9.90723	1.07894	9.18235	3,19886287416031	6.58616e-06
ENST00000624845	37.3697	4.07074	9.18008	3,19850629404009	2.83587e-07
ENST00000518700	4.59636	0.505037	9.10102	3,1860286363845	0.0019296
NONHSAT086649.2	0.43704	0.0480209	9.10102	3,18602863638449	0.0019296
ENST00000624058	2.85249	0.313425	9.10102	3,18602863638449	1.81519e-05
ENST00000573063	0.806981	0.0886692	9.10102	3,18602863638449	0.0019296
NONHSAT037688.2	1.28359	0.141038	9.10102	3,18602863638449	0.0019296
NONHSAT191075.1	0.22583	0.0248137	9.10102	3,18602863638449	0.0019296
NONHSAT160842.1	4.54797	0.499721	9.10102	3,18602863638449	0.0019296
NONHSAT070019.2	1.13289	0.125112	9.05501	3,17871692397368	0.000234216
ENST00000580459	0.763889	0.0843609	9.05501	3,17871692397368	0.000234216
ENST00000623196	0.943164	0.104649	9.01262	3,17194609861882	5.37062e-05
NONHSAT167267.1	20.4569	2.2783	8.97905	3,16656275342136	3.02417e-07
NONHSAT018220.2	0.448494	0.0501731	8.93894	3,16010436953651	0.000942369
NONHSAT216421.1	0.128377	0.0143615	8.93894	3,16010436953651	0.000942369
ENST00000421331	1.11086	0.124272	8.93894	3,1601043695365	0.000942369
NONHSAT125127.2	2.89546	0.323935	8.9384	3,16001639662803	1.25999e-05
NONHSAT078117.2	3.35443	0.375301	8.93797	3,1599479683034	0.00451911
ENST00000498656	5.95559	0.666325	8.93797	3,15994796830339	0.00451911
NONHSAT216395.1	0.577721	0.0646367	8.93797	3,15994796830339	0.00451911
ENST00000609937	1.21761	0.136228	8.93797	3,15994796830339	0.00451911
NONHSAT100463.2	1.59525	0.17848	8.93797	3,15994796830339	0.00451911
ENST00000447933	2.21585	0.247914	8.93797	3,15994796830339	0.00451911
NONHSAT182508.1	4.94837	0.557518	8.87571	3,14986302092899	3.42452e-05
ENST00000594688	1.58645	0.179299	8.84804	3,14535798119207	0.000112919
ENST00000624786	6.96397	0.789305	8.82291	3,14125419265014	0.000293832
NONHSAT069808.2	10.8359	1.23049	8.80617	3,13851416473564	1.09212e-06
ENST00000622091	2.52136	0.286408	8.8034	3,13806076532254	5.35922e-05
NONHSAT023415.2	2.47553	0.282077	8.77609	3,13357828768318	9.10391e-05
NONHSAT060810.2	1.51173	0.172255	8.77609	3,13357828768318	0.0025168
ENST00000602607	11.3215	1.29004	8.77609	3,13357828768318	0.0025168
NONHSAT059092.2	1.34849	0.1541	8.75074	3,12940541028435	3.96542e-05
NONHSAT134530.2	3.38093	0.389124	8.68856	3,1191164044037	4.21496e-06
NONHSAT118823.2	1.37773	0.158947	8.66786	3,11567511363401	0.00119728
NONHSAT195695.1	3.06694	0.353829	8.66786	3,11567511363401	0.00119728
NONHSAT148833.1	6.40276	0.738696	8.66766	3,11564218927105	3.06768e-05
ENST00000556407	5.85977	0.67606	8.66753	3,11562024036884	0.000166089
NONHSAT209234.1	2.80984	0.324181	8.66753	3,11562024036884	0.000166089
NONHSAT092803.2	2.14314	0.248813	8.61344	3,10658982053511	0.000108916
ENST00000635274	4856.8	564.147	8.6091	3,10586296455343	1.3543e-07
NONHSAT015495.2	4.38234	0.51127	8.57147	3,09954265774013	8.39968e-07
NONHSAT208078.1	3.04416	0.355238	8.56935	3,09918656439292	8.86072e-05
NONHSAT171993.1	9.77389	1.14341	8.54801	3,09558843424492	7.21252e-07
NONHSAT212305.1	1.07299	0.125763	8.53183	3,09285472373032	0.00609066
NONHSAT004848.2	1.64156	0.192404	8.53183	3,09285472373032	0.00609066
NONHSAT168149.1	3.83483	0.449473	8.53183	3,09285472373032	0.000268307
NONHSAT153074.1	0.274287	0.0321487	8.53183	3,09285472373032	0.00609066
NONHSAT173469.1	1.33351	0.156298	8.53183	3,09285472373031	0.00609066
NONHSAT193995.1	2.40774	0.283237	8.5008	3,08759879114171	5.33179e-05
NONHSAT209559.1	28.0208	3.30665	8.47408	3,08305617182677	4.59435e-05
NONHSAT072513.2	14.0928	1.66714	8.45329	3,07951227320326	2.73964e-07
NONHSAT183230.1	3.62084	0.428461	8.45079	3,07908684039984	0.00329064
NONHSAT093715.2	1.31883	0.15606	8.45079	3,07908684039984	0.00329064
NONHSAT161824.1	2.46128	0.291248	8.45079	3,07908684039984	0.00329064
ENST00000602304	2.68893	0.318187	8.45079	3,07908684039984	0.00329064
ENST00000625445	0.972943	0.115531	8.42149	3,07407557658193	0.000104948
ENST00000420981	2.43312	0.289758	8.39707	3,0698860602449	0.00152434
NONHSAT079029.2	0.925603	0.110229	8.39707	3,0698860602449	8.61423e-05
NONHSAT200178.1	2.10097	0.25136	8.35843	3,06323281233267	0.000465368
NONHSAT126648.2	1.83095	0.219829	8.32899	3,05814118857511	8.45142e-06
ENST00000606861	1.21667	0.146476	8.30629	3,05420508307156	0.000245811
NONHSAT115901.2	3.19128	0.385024	8.28851	3,05111261285037	0.00015652
NONHSAT151899.1	7.17703	0.867442	8.27379	3,04854857089979	0.000124451
NONHSAT115964.2	6.10696	0.744099	8.20719	3,03688747888348	2.57732e-05
NONHSAT124029.2	3.09784	0.377627	8.20343	3,03622799944397	2.11746e-05
NONHSAT001281.2	2.81276	0.343288	8.1936	3,0344975081244	1.01888e-05
NONHSAT213803.1	146.344	17.9083	8.17188	3,03066852876821	8.58208e-07
NONHSAT104810.2	14.0762	1.72354	8.16705	3,02981531390773	1.13643e-06
NONHSAT211881.1	1.18276	0.145087	8.15209	3,02716971154544	1.65333e-06
NONHSAT060576.2	3.48884	0.429325	8.12633	3,02260363136251	0.000587516
NONHSAT078247.2	0.880757	0.108384	8.12628	3,02259595727517	0.00194477
ENST00000565861	9.62817	1.18486	8.12598	3,02254219538081	6.01254e-05
ENST00000498809	1.87264	0.230454	8.12586	3,0225206855735	0.00431262
NONHSAT118564.2	1.41047	0.173578	8.12586	3,0225206855735	0.000188015
NONHSAT025114.2	1.49174	0.183579	8.12586	3,0225206855735	0.00431262
NONHSAT116258.2	0.261003	0.0321201	8.12586	3,0225206855735	0.00431262
NONHSAT018006.2	0.865811	0.106551	8.12578	3,0225063547856	0.000299741
ENST00000623393	2.24791	0.27664	8.12578	3,0225063547856	3.56077e-05
ENST00000591222	1.18941	0.146375	8.12578	3,02250635478559	0.000299741
NONHSAT209043.1	20.9961	2.59624	8.08713	3,01562729267062	3.35799e-06
ENST00000522618	15.6895	1.94075	8.08423	3,01511056796992	5.00131e-06
NONHSAT216823.1	0.0807983	0.01	8.07983	3,01432568294908	0.00487477
NONHSAT012888.2	6.30823	0.783733	8.04895	3,00880060383036	7.41936e-07
NONHSAT211781.1	4.10447	0.511493	8.02448	3,00440743662042	5.91996e-05
NONHSAT177671.1	0.0801853	0.01	8.01853	3,00333854122394	0.00487477
NONHSAT129230.2	30.0767	3.76288	7.99301	2,99873818723086	5.78453e-07
NONHSAT183951.1	1.59497	0.199602	7.99074	2,99832927110412	0.000139789
NONHSAT163274.1	1.58708	0.199752	7.94527	2,99009546897858	0.000366077
NONHSAT015753.2	2.7429	0.346202	7.92282	2,98601424628676	6.74887e-05
NONHSAT060064.2	5.84245	0.739388	7.90175	2,98217144102733	1.10127e-05
NONHSAT192481.1	0.805166	0.101994	7.89422	2,98079701221987	0.000743295
ENST00000577405	9.14017	1.15783	7.89422	2,98079701221987	0.000743295
NONHSAT204449.1	11.8698	1.50361	7.89422	2,98079701221987	0.000743295
ENST00000393264	3.30795	0.419056	7.8938	2,98071975658444	3.21576e-05
NONHSAT081257.2	7.14878	0.912937	7.83053	2,96910975505041	0.000209026
NONHSAT134432.2	10.0351	1.28305	7.82128	2,96740447742553	7.69938e-05
NONHSAT186053.1	2.97643	0.380699	7.81834	2,96686224736932	8.30739e-06
NONHSAT101251.2	0.944256	0.121044	7.80093	2,96364581761886	0.005665
ENST00000478965	5.04547	0.646778	7.80093	2,96364581761886	0.000328572
NONHSAT071151.2	3.74078	0.47953	7.80093	2,96364581761886	0.005665
NONHSAT176487.1	2.36486	0.303151	7.80093	2,96364581761886	0.005665
NONHSAT000027.2	4.32701	0.555044	7.79578	2,96269412411687	2.87905e-06
NONHSAT174124.1	20.3763	2.61715	7.7857	2,96082669868913	5.54866e-06
NONHSAT139638.2	2.18404	0.281284	7.76455	2,95690217255465	0.000447797
ENST00000463167	13.0015	1.68419	7.71974	2,94855151496322	8.79008e-05
ENST00000553141	3.73482	0.483828	7.7193	2,94847087918414	0.000634492
ENST00000514980	0.984292	0.128116	7.68283	2,94163779894698	0.00024907
NONHSAT095695.2	8.49325	1.1058	7.68063	2,94122473648043	3.19452e-06
ENST00000607166	2.62009	0.341406	7.67439	2,94005262976655	6.47311e-05
ENST00000467458	2.39295	0.31231	7.66211	2,93774266834999	0.000942369
NONHSAT179392.1	3.78321	0.493756	7.66211	2,93774266834999	0.000942369
NONHSAT162689.1	0.533742	0.0698756	7.63846	2,93328217969814	0.000396863
NONHSAT121707.2	5.8558	0.770148	7.60347	2,92665849447229	1.93113e-05
ENST00000624299	3.32652	0.441037	7.54249	2,91504140761474	1.20475e-05
NONHSAT037488.2	3.49764	0.464178	7.53513	2,91363254736567	0.000297148
NONHSAT124042.2	3.02188	0.402037	7.51644	2,91004857573668	2.93021e-05
NONHSAT188961.1	7.49266	0.996863	7.51623	2,91000935260543	0.000790387
ENST00000316786	2.37961	0.31699	7.50688	2,9082142680334	6.10453e-05
ENST00000390551	13.7513	1.83455	7.49573	2,90606872065852	7.32732e-06
ENST00000602957	3.00786	0.401381	7.49378	2,90569312172554	9.33272e-05
NONHSAT220832.1	49.3954	6.63042	7.4498	2,89720215161798	2.58582e-06
NONHSAT175358.1	3.60225	0.483587	7.44902	2,89705040955772	0.000270629
NONHSAT168534.1	0.370592	0.0498795	7.42975	2,89331341244749	0.00119728
NONHSAT145608.2	4.99775	0.672667	7.42975	2,89331341244749	0.00119728
ENST00000618776	4.3543	0.586063	7.42975	2,89331341244749	0.00119728
NONHSAT199700.1	2.31603	0.311724	7.42975	2,89331341244749	0.00119728
NONHSAT199990.1	23.1968	3.12557	7.4216	2,89173120408947	3.77945e-06
NONHSAT189066.1	1.78984	0.241563	7.40942	2,8893611647158	3.77871e-06
ENST00000527426	18.0885	2.44184	7.40775	2,88903489687172	9.99989e-06
NONHSAT184650.1	2.09213	0.282586	7.40352	2,88821138372269	0.000673206
NONHSAT189622.1	4.0394	0.546806	7.38727	2,8850406200888	0.00035494
NONHSAT142635.2	90.8823	12.3742	7.34451	2,87666660258627	3.64465e-06
NONHSAT077997.2	1.0802	0.147696	7.31363	2,87058688896036	0.000320098
MSTRG.42468.1	4.10071	0.560694	7.31363	2,87058688896036	0.00525705
NONHSAT192967.1	0.456233	0.0623812	7.31363	2,87058688896035	0.00525705
NONHSAT087398.2	3.04555	0.416422	7.31363	2,87058688896035	0.00525705
NONHSAT204483.1	56.7732	7.83761	7.24369	2,85672544309524	2.24794e-05
NONHSAT210032.1	0.879187	0.121442	7.23957	2,8559034929574	0.000424492
ENST00000561507	12.5233	1.73444	7.22039	2,85207705945614	7.31427e-06
ENST00000440018	6.85588	0.950648	7.2118	2,85035856432023	0.000172354
NONHSAT207075.1	5.39689	0.748342	7.2118	2,85035856432023	0.000172354
NONHSAT011826.2	4.84336	0.671589	7.2118	2,85035856432023	0.000172354
NONHSAT028699.2	6.54587	0.908703	7.20353	2,84870328484791	7.25211e-06
ENST00000446028	3.3545	0.466055	7.19764	2,84752435905838	0.00152434
ENST00000356215	0.518033	0.0719726	7.19764	2,84752435905838	0.00152434
NONHSAT102741.2	0.911841	0.126686	7.19764	2,84752435905838	0.00152434
NONHSAT189470.1	3.75472	0.521682	7.19734	2,84746291941265	9.45001e-05
NONHSAT115963.2	6.45549	0.896947	7.19718	2,84743220057096	0.000266114
NONHSAT204913.1	8.163	1.13419	7.19718	2,84743220057095	0.000266114
ENST00000607703	11.3899	1.58525	7.18495	2,84497813762283	0.000114375
NONHSAT148099.2	0.425593	0.0592907	7.17808	2,84359842181228	0.000379024
NONHSAT204739.1	3.36783	0.470967	7.15088	2,83812104622861	0.000705128
NONHSAT024276.2	50.4651	7.07157	7.13634	2,83518368027725	2.38445e-06
ENST00000433624	1.58658	0.223152	7.10986	2,82982031789653	0.00123316
NONHSAT050228.2	3.70928	0.52171	7.10986	2,82982031789652	0.00123316
NONHSAT004440.2	9.0313	1.27025	7.10986	2,82982031789652	0.00123316
ENST00000623261	3.87166	0.545348	7.09944	2,82770569949276	0.000145362
NONHSAT085150.2	5.05925	0.713388	7.09187	2,82616575213416	0.00060939
ENST00000473384	16.9906	2.39941	7.08114	2,82398090570674	0.000309831
NONHSAT088008.2	8.2772	1.17296	7.05669	2,81899130951889	2.80781e-05
ENST00000611343	7.78616	1.11306	6.9953	2,80638567472466	0.000108883
NONHSAT208890.1	2.25378	0.323561	6.96554	2,80023425608865	0.00194477
ENST00000590983	1.43855	0.206524	6.96554	2,80023425608865	0.00194477
NONHSAT170585.1	0.633624	0.0909656	6.96554	2,80023425608865	0.00194477
NONHSAT080117.2	0.547323	0.0785759	6.96554	2,80023425608865	0.00194477
NONHSAT114718.2	0.610882	0.0877006	6.96554	2,80023425608865	0.00194477
NONHSAT081901.2	2.94806	0.427692	6.89296	2,78512454788322	5.43758e-05
ENST00000604271	2.37879	0.345212	6.89083	2,78467694483283	7.04701e-05
NONHSAT075142.2	8.20782	1.19372	6.87586	2,78154010963094	6.88977e-05
NONHSAT123393.2	3.85768	0.561047	6.87586	2,78154010963094	6.88977e-05
ENST00000548397	10.3247	1.50164	6.87562	2,78149048729304	0.000471568
NONHSAT090915.2	8.12921	1.18232	6.87562	2,78149048729303	0.000471568
NONHSAT136388.2	6.86029	0.999231	6.86557	2,77938033656565	2.26935e-05
ENST00000614612	4.38897	0.639626	6.86177	2,77858171530945	0.00125561
NONHSAT100049.2	1.23062	0.17968	6.84891	2,77587541143018	0.000421117
NONHSAT207307.1	3.16313	0.465419	6.7963	2,76475059483688	0.000879111
NONHSAT193698.1	12.2224	1.80183	6.78331	2,76198951846547	0.000148925
ENST00000456638	4.17475	0.617812	6.75732	2,75645021473388	0.000236428
ENST00000519805	8.94376	1.32608	6.74453	2,75371869897557	0.000220722
NONHSAT090970.2	24.8187	3.68281	6.73906	2,75254742071969	5.34452e-06
ENST00000624389	0.982184	0.145872	6.73317	2,75128571549435	0.00318492
NONHSAT087533.2	7.08043	1.05157	6.73317	2,75128571549434	0.00318492
ENST00000563357	6.19449	0.920029	6.73293	2,7512342398555	5.41645e-05
NONHSAT129236.2	8.48866	1.26155	6.72878	2,75034516962297	2.45235e-05
NONHSAT080546.2	0.292252	0.0435956	6.70371	2,744959354884	0.00193774
NONHSAT112854.2	0.970313	0.144743	6.70371	2,74495935488399	0.00193774
ENST00000608721	2.66702	0.398556	6.69172	2,7423764493652	0.000314562
NONHSAT094435.2	0.584142	0.0874299	6.68126	2,74012018873074	0.00155038
NONHSAT069822.2	2.39288	0.358148	6.68126	2,74012018873074	0.00155038
ENST00000608072	4.57786	0.687026	6.6633	2,73623696097271	0.00126844
NONHSAT189623.1	6.97169	1.04859	6.64861	2,73305186655092	0.00105781
NONHSAT182864.1	0.61125	0.0919366	6.64861	2,73305186655092	0.00105781
ENST00000621933	1.91289	0.287713	6.64861	2,73305186655092	0.00105781
ENST00000499685	0.609212	0.0916301	6.64861	2,73305186655092	0.00105781
NONHSAT196848.1	15.1422	2.28176	6.6362	2,7303563203711	6.18661e-05
NONHSAT181599.1	1.66279	0.251846	6.60243	2,7229963864491	0.000456339
NONHSAT193996.1	7.4822	1.13363	6.60021	2,72251247765632	3.54303e-05
NONHSAT162857.1	2.91703	0.442233	6.59615	2,72162456925444	0.000359824
NONHSAT161805.1	4.72788	0.716763	6.59615	2,72162456925444	0.000359824
NONHSAT029225.2	31.2422	4.74189	6.58855	2,71996078418711	8.33597e-06
NONHSAT009385.2	1.42202	0.216996	6.55321	2,71220179474112	8.7087e-05
NONHSAT005531.2	1.00217	0.153129	6.54458	2,71030068230913	7.02808e-05
ENST00000453910	3.86456	0.59445	6.50106	2,70067553647515	0.00408795
NONHSAT010775.2	1.1346	0.174526	6.50106	2,70067553647515	0.00408795
ENST00000483947	3.25835	0.501203	6.50106	2,70067553647515	0.00408795
NONHSAT088827.2	7.37724	1.13479	6.50097	2,70065441889603	0.000896839
NONHSAT186488.1	0.511464	0.0786767	6.50083	2,70062485527684	0.00154686
ENST00000412946	4.14808	0.638085	6.50083	2,70062485527684	0.00154686
NONHSAT028404.2	2.79286	0.42962	6.50077	2,70061073476057	0.000526002
ENST00000635373	9.77277	1.50334	6.5007	2,70059429307667	0.000342598
NONHSAT220385.1	9.09095	1.39846	6.5007	2,70059429307667	0.000342598
ENST00000624206	1.79266	0.27577	6.50057	2,70056654344418	0.000771342
NONHSAT050235.2	4.54581	0.699296	6.50054	2,700560334992	0.00191727
NONHSAT196130.1	9.22753	1.4195	6.50054	2,700560334992	0.00191727
NONHSAT106799.2	1.24127	0.190953	6.50041	2,7005300989815	0.00243542
NONHSAT026842.2	1.22891	0.189052	6.50041	2,70053009898149	0.00243542
NONHSAT192820.1	5.08058	0.783076	6.48798	2,69777033573957	1.5174e-05
NONHSAT004841.2	1.53104	0.236753	6.46684	2,6930610047762	4.47605e-05
NONHSAT038052.2	7.07412	1.09457	6.46291	2,69218363243141	2.22402e-05
NONHSAT152445.1	0.0645859	0.01	6.45859	2,6912196188645	0.00487477
MSTRG.40465.1	5.45587	0.85203	6.40338	2,67883383283574	1.51567e-05
NONHSAT102283.2	1.95599	0.305661	6.39923	2,67789786023054	0.000606748
ENST00000623551	2.51515	0.393692	6.38864	2,67550799517753	0.000131786
NONHSAT050233.2	3.81262	0.597159	6.3846	2,67459654988377	0.000786327
ENST00000607675	1.12379	0.176016	6.3846	2,67459654988377	0.000786327
NONHSAT137346.2	5.29768	0.82976	6.3846	2,67459654988377	0.000786327
NONHSAT040317.2	3.29548	0.516877	6.37575	2,67259509821106	0.000149957
NONHSAT193699.1	16.968	2.66275	6.37239	2,67183387548267	3.17221e-05
NONHSAT053482.2	0.592911	0.0931434	6.36557	2,67029078097532	0.00127536
NONHSAT083938.2	2.80218	0.440641	6.35933	2,66887563288222	0.000281904
NONHSAT069699.2	1.05823	0.166571	6.35304	2,66744768431997	0.00153711
NONHSAT151002.1	5.23791	0.827527	6.32959	2,66211096611201	0.000439987
NONHSAT194683.1	0.525976	0.0832236	6.32003	2,65993115402183	0.00237455
NONHSAT170830.1	2.1972	0.347657	6.32003	2,65993115402183	0.00237455
NONHSAT123371.2	0.395889	0.0626404	6.32003	2,65993115402183	0.00237455
ENST00000518535	14.3037	2.26706	6.30935	2,65749104363002	0.000540777
NONHSAT208400.1	7.97253	1.26595	6.29769	2,65482168137147	0.000700406
NONHSAT185500.1	2.24157	0.355956	6.29733	2,65474104559239	0.00306617
ENST00000586885	0.818208	0.130517	6.26896	2,64822518777384	0.00525705
NONHSAT059840.2	2.03037	0.323877	6.26896	2,64822518777383	0.00525705
NONHSAT143758.2	1.08272	0.172712	6.26896	2,64822518777383	0.00525705
ENST00000587694	1.82222	0.291532	6.25049	2,64396936458599	0.00107606
MSTRG.44282.1	7.51967	1.20379	6.24668	2,64309024993716	0.000139256
ENST00000579003	24.1668	3.88556	6.21965	2,63683261937839	2.54694e-05
ENST00000581811	51.3494	8.25635	6.21939	2,63677298294101	6.70566e-05
NONHSAT051139.2	1.04447	0.169125	6.17572	2,62660729255948	0.00230963
NONHSAT126122.2	24.0099	3.89047	6.17147	2,62561431060858	1.96237e-05
NONHSAT030457.2	0.965642	0.156573	6.16736	2,62465412548927	0.000126881
NONHSAT195835.1	23.4362	3.80733	6.15555	2,62188795846471	3.29103e-05
NONHSAT213994.1	13.3196	2.16494	6.15238	2,62114456213834	0.00108021
ENST00000592939	1.68066	0.274702	6.11811	2,61308623045019	0.000817713
NONHSAT157683.1	5.51596	0.902204	6.11387	2,61208617394046	0.000522243
NONHSAT013498.2	6.59795	1.08044	6.10671	2,61039579586504	0.000171265
NONHSAT217414.1	9.33312	1.5314	6.09449	2,60750469610197	0.000577487
NONHSAT021619.2	0.721968	0.118467	6.09426	2,60745094262266	0.00386674
ENST00000457484	0.602925	0.0989333	6.09426	2,60745094262266	0.00386674
ENST00000518916	2.67897	0.439589	6.09426	2,60745094262266	0.00386674
NONHSAT139963.2	10.1519	1.66581	6.09426	2,60745094262266	0.00386674
NONHSAT134431.2	7.86104	1.29266	6.0813	2,60437897511459	6.26411e-05
ENST00000591365	3.48189	0.572748	6.07928	2,6038994009123	0.000256135
ENST00000623870	3.1832	0.523615	6.07928	2,6038994009123	0.000256135
MSTRG.40472.1	4.19286	0.689902	6.07747	2,60347051660763	4.49255e-05
NONHSAT192274.1	20.3678	3.35594	6.06918	2,60150090892143	1.63319e-05
ENST00000431019	0.941917	0.155244	6.06735	2,60106613566334	0.00108205
ENST00000623674	37.7502	6.22935	6.06006	2,59933306908648	2.14348e-05
NONHSAT155826.1	30.5222	5.043	6.05238	2,5975015522974	0.00022763
ENST00000628924	6.58593	1.08846	6.0507	2,59710294739452	6.62759e-05
NONHSAT220447.1	0.920312	0.15246	6.03642	2,59369298360679	0.000587639
NONHSAT151387.1	4.43472	0.734661	6.03642	2,59369298360679	0.000587639
ENST00000326734	2.06059	0.341365	6.03633	2,59367260603491	0.00126773
NONHSAT168458.1	138.185	22.9102	6.03159	2,59253920417588	4.3535e-05
NONHSAT158989.1	8.3077	1.37797	6.02895	2,59190587764871	0.000223311
NONHSAT082316.2	9.05529	1.5059	6.01321	2,58813486582898	0.000162352
NONHSAT114356.2	29.4786	4.90394	6.01121	2,58765513424852	3.28344e-05
NONHSAT196374.1	4.07551	0.679428	5.99843	2,58458595983449	9.78342e-05
NONHSAT156015.1	2.95094	0.495203	5.95904	2,57507930755938	0.00126089
NONHSAT191011.1	3.29188	0.553857	5.94355	2,57132419372323	0.000215621
NONHSAT071132.2	0.365285	0.0617005	5.92029	2,5656673544536	0.0014891
NONHSAT180222.1	21.7995	3.6822	5.92022	2,5656515384639	0.000291652
NONHSAT204482.1	76.1061	12.8887	5.90485	2,56190082420937	0.000108248
NONHSAT220642.1	5.90198	1.00001	5.90195	2,56119185167828	0.000830771
ENST00000530595	1.60391	0.272246	5.8914	2,55861085228136	0.00125284
ENST00000602954	6.69898	1.13708	5.8914	2,55861085228136	0.00125284
NONHSAT148540.1	9.15487	1.55396	5.89131	2,5585891619131	0.00020035
NONHSAT175466.1	0.830826	0.141034	5.89096	2,55850240202836	0.00617918
ENST00000597199	1.30234	0.221074	5.89096	2,55850240202836	0.00617918
NONHSAT190898.1	8.44908	1.43651	5.88169	2,55623025228325	0.000745137
NONHSAT196377.1	2.10951	0.35903	5.87558	2,55473085871064	0.00211837
NONHSAT084957.2	2.43863	0.415045	5.87558	2,55473085871064	0.00211837
NONHSAT066472.2	2.06505	0.352963	5.85061	2,54858591224203	0.00346637
NONHSAT000210.2	3.49369	0.597151	5.85061	2,54858591224202	0.00346637
NONHSAT087397.2	1.35026	0.23079	5.85061	2,54858591224202	0.00346637
NONHSAT102279.2	1.94134	0.332506	5.83852	2,54560323033844	0.000379969
NONHSAT081259.2	3.07635	0.527007	5.8374	2,5453248648619	0.00014195
ENST00000584179	2.74105	0.470049	5.83141	2,54384588219686	0.00124396
ENST00000456018	5.1918	0.891495	5.8237	2,54193635108185	0.00261191
NONHSAT194004.1	1.9734	0.339467	5.81322	2,53933826103928	0.000410373
NONHSAT212183.1	3.99169	0.688198	5.80021	2,53610555377914	0.000131586
NONHSAT185914.1	1.40279	0.242762	5.77844	2,5306796885499	0.000171854
ENST00000621477	1.43041	0.247549	5.77828	2,5306409351068	0.00455058
NONHSAT160838.1	7.11338	1.23452	5.76208	2,52658995839832	0.0032913
NONHSAT148415.1	3.08928	0.53614	5.76208	2,52658995839832	0.0032913
NONHSAT189626.1	5.5606	0.966959	5.7506	2,52371291788732	0.000163632
ENST00000623228	1.94574	0.338362	5.75047	2,52367933933407	0.00251507
ENST00000441379	1.79189	0.312052	5.74229	2,52162731981396	0.00171615
NONHSAT160501.1	4.19309	0.731046	5.73574	2,51998018698253	0.00143257
NONHSAT171995.1	3.59967	0.627586	5.73574	2,51998018698253	0.00143257
MSTRG.20289.1	3.29731	0.576517	5.71936	2,51585333935399	0.000173198
NONHSAT055277.2	31.3328	5.48319	5.71433	2,51458530559261	6.01154e-05
NONHSAT056177.2	3.31117	0.579753	5.71135	2,51383142392872	0.000320821
ENST00000434051	0.531218	0.0933877	5.68831	2,50799973838282	0.00313252
ENST00000562983	5.29482	0.93086	5.6881	2,50794597969443	0.000542113
NONHSAT211772.1	3.02844	0.532417	5.6881	2,50794597969443	0.000542113
NONHSAT172789.1	7.07237	1.24338	5.688	2,50792154458918	0.000946655
ENST00000448179	3.80315	0.670844	5.6692	2,50314527966802	0.000226584
NONHSAT093877.2	5.68409	1.00297	5.66728	2,50265750981349	0.000323153
NONHSAT206588.1	0.632178	0.111624	5.66346	2,50168410618865	0.000394153
NONHSAT148344.1	1.03769	0.183404	5.65794	2,50027693975963	0.000512704
NONHSAT207833.1	16.2029	2.86442	5.65661	2,49993675317139	8.07725e-05
NONHSAT153195.1	5.88395	1.0409	5.65273	2,49894839083881	0.000946133
NONHSAT155532.1	5.18071	0.918003	5.64346	2,49658022142495	0.000107085
NONHSAT114444.2	1.87651	0.333069	5.63398	2,49415536371053	0.00200444
NONHSAT138971.2	1.19268	0.212014	5.6255	2,49198061104811	0.00298876
NONHSAT046696.2	2.80218	0.498121	5.6255	2,49198061104811	0.00298876
NONHSAT215596.1	1.28758	0.229343	5.61423	2,48908813017796	0.000429033
NONHSAT151930.1	9.01724	1.60872	5.60523	2,48677295369253	0.000229451
NONHSAT190710.1	2.71482	0.484983	5.59777	2,4848518817177	0.00566802
NONHSAT193682.1	1.3551	0.242079	5.59777	2,4848518817177	0.00162027
ENST00000558375	2.48108	0.443226	5.59777	2,4848518817177	0.00566802
ENST00000586452	2.8886	0.516027	5.59777	2,4848518817177	0.00566802
NONHSAT101498.2	24.996	4.47175	5.58975	2,48278437360616	5.30291e-05
NONHSAT153279.1	5.44031	0.973804	5.58666	2,48198603068427	0.00195241
NONHSAT202547.1	3.20987	0.574559	5.58666	2,48198603068427	0.00195241
MSTRG.15141.1	3.56527	0.638397	5.58472	2,48148451991067	0.000219117
NONHSAT116012.2	1.97773	0.356339	5.55012	2,47252005099751	0.000113831
NONHSAT035083.2	2.48607	0.448375	5.54461	2,47108634797097	0.00190359
NONHSAT219887.1	1.22926	0.222463	5.52567	2,46615011212922	0.00522805
NONHSAT150277.1	3.38481	0.612561	5.52567	2,46615011212922	0.00137793
NONHSAT066646.2	3.80178	0.688022	5.52567	2,46615011212922	0.00522805
NONHSAT175686.1	2.17155	0.392993	5.52567	2,46615011212922	0.00522805
ENST00000502125	10.1538	1.84485	5.5039	2,46045332500019	0.000177759
NONHSAT073124.2	1.21589	0.22105	5.50053	2,45956972524111	0.00355477
NONHSAT181619.1	1.75794	0.320493	5.48512	2,45552251008692	0.00226673
NONHSAT039800.2	10.722	1.96089	5.4679	2,45098580580671	8.78746e-05
NONHSAT216957.1	8.65334	1.58517	5.45895	2,44862301252935	0.00046714
ENST00000566942	1.04173	0.190933	5.45597	2,44783692130137	0.00337164
NONHSAT159677.1	5.5464	1.01874	5.44435	2,44475946504225	0.00156347
NONHSAT047199.2	4.25679	0.785745	5.41752	2,43763345655401	0.00451877
NONHSAT149448.1	6.33144	1.16874	5.41732	2,43757969099563	0.00153719
NONHSAT104039.2	4.07632	0.75247	5.41725	2,43756014517786	0.000603854
NONHSAT199898.1	3.0662	0.566007	5.41725	2,43755953258099	0.00131301
ENST00000611082	2.12308	0.391911	5.41724	2,43755818485234	0.0027406
NONHSAT101238.2	0.823116	0.151945	5.41719	2,43754385406444	0.000768344
NONHSAT013501.2	4.28358	0.791728	5.41043	2,43574204170825	0.000179735
NONHSAT196741.1	14.4629	2.67648	5.40369	2,43394608728099	0.000182757
ENST00000600723	1.8931	0.351652	5.38346	2,42853404293885	0.00263344
NONHSAT196660.1	4.51989	0.840806	5.37567	2,42644480974535	0.000849547
NONHSAT087996.2	1.71362	0.318787	5.37542	2,42637642881717	0.00423158
ENST00000624142	2.82105	0.524807	5.37542	2,42637642881717	0.00423158
NONHSAT094494.2	1.52883	0.284411	5.37542	2,42637642881717	0.00423158
NONHSAT216326.1	3.14163	0.584444	5.37542	2,42637642881716	0.00423158
NONHSAT185717.1	37.6448	7.03315	5.35248	2,42020770415019	0.000195792
ENST00000563205	3.21965	0.603989	5.33064	2,41430886608535	0.00105425
NONHSAT192272.1	35.9488	6.74553	5.32927	2,41393920128878	8.65115e-05
NONHSAT190899.1	3.459	0.64933	5.32703	2,41333093103479	0.000669374
ENST00000452320	1.09521	0.20607	5.31473	2,40999647287928	0.000621916
NONHSAT217655.1	3.20653	0.603989	5.30893	2,40842105772094	0.0032081
NONHSAT199769.1	5.17078	0.976821	5.29347	2,40421487122303	0.000723009
NONHSAT202777.1	1.73227	0.327959	5.28198	2,40107862516019	0.00543482
NONHSAT152089.1	6.2312	1.18513	5.25781	2,39446152637389	0.00292963
NONHSAT199900.1	2.51782	0.479543	5.25045	2,39243981611814	0.00504141
NONHSAT167243.1	0.399405	0.0761533	5.24476	2,39087563148388	0.00191646
NONHSAT121219.2	11.2435	2.14709	5.23664	2,38864105262759	0.00281053
NONHSAT108138.2	4.71703	0.90078	5.2366	2,38863178119587	0.0010446
ENST00000604430	3.09062	0.591202	5.2277	2,38617541549229	0.000401424
NONHSAT104807.2	19.9592	3.81858	5.22686	2,38594528497849	0.000727684
MSTRG.686.1	7.85935	1.50438	5.22432	2,38524355440367	0.000150055
NONHSAT091618.2	2.2313	0.427145	5.22375	2,38508667363885	0.0047013
ENST00000623755	1.17532	0.224996	5.22375	2,38508667363885	0.0047013
NONHSAT157448.1	12.3555	2.36526	5.22375	2,38508667363885	0.0047013
NONHSAT150158.1	10.0564	1.92736	5.2177	2,38341316462071	0.00270259
NONHSAT138297.2	2.53082	0.486078	5.20661	2,38034308480087	0.000445788
NONHSAT176586.1	9.54397	1.83422	5.20329	2,37942306219643	0.000211636
NONHSAT082319.2	7.7323	1.4901	5.18913	2,37549285432162	0.000457806
NONHSAT116015.2	5.25327	1.01255	5.18814	2,37521700032597	0.00129833
NONHSAT217670.1	2.66124	0.513459	5.18295	2,3737744771706	0.000852164
NONHSAT163507.1	44.3931	8.57031	5.17987	2,37291698830709	0.000152017
NONHSAT041008.2	1.87819	0.36304	5.17351	2,37114366146626	0.000445209
NONHSAT223314.1	5.5774	1.08042	5.16224	2,36799800577652	0.00338651
ENST00000617058	1.12291	0.218651	5.13561	2,36053511932932	0.00146617
NONHSAT203400.1	3.34295	0.653005	5.11933	2,35595363782681	0.00296242
NONHSAT217573.1	2.5882	0.505575	5.11933	2,3559536378268	0.00296242
NONHSAT152444.1	12.5393	2.45088	5.11626	2,3550901290454	0.00128424
ENST00000556720	14.3817	2.81099	5.11626	2,3550901290454	0.00128424
ENST00000615012	24.4682	4.78707	5.11131	2,35369229572556	0.000199569
ENST00000420902	5.62767	1.10107	5.11109	2,35363227944634	0.000411154
ENST00000562811	3.24339	0.63499	5.10777	2,35269428526044	0.00251487
NONHSAT200257.1	1.08473	0.213013	5.09231	2,34831967897699	0.0051673
NONHSAT190900.1	4.72783	0.928426	5.09231	2,34831967897699	0.0051673
NONHSAT008336.2	1.49707	0.294393	5.08529	2,34633141666702	0.00123349
ENST00000608032	5.35782	1.05495	5.07872	2,34446490797723	0.00414572
NONHSAT193997.1	0.668422	0.131613	5.0787	2,34445953869074	0.00228832
NONHSAT081904.2	4.34665	0.859698	5.05602	2,33800305913446	0.00142469
NONHSAT199901.1	3.26	0.645593	5.04962	2,33617460077028	0.0014055
NONHSAT209561.1	5.38684	1.06922	5.03809	2,33287745896773	0.0033712
NONHSAT212203.1	5.81791	1.15939	5.01808	2,32713637997453	0.000635526
NONHSAT033912.2	1.92622	0.384404	5.01093	2,3250788081836	0.0025601
NONHSAT196375.1	3.53852	0.706603	5.00779	2,32417534154539	0.00040917
NONHSAT006310.2	32.0276	6.41629	4.99161	2,31950612309255	0.00019811
NONHSAT039765.2	12.8932	2.5893	4.9794	2,31597113385542	0.000237443
NONHSAT153273.1	1.05719	0.212377	4.97791	2,31554092672259	0.000338878
NONHSAT148555.1	10.7097	2.1518	4.97709	2,31530211062024	0.000442528
ENST00000623307	4.10276	0.826609	4.96336	2,31131668150397	0.00126932
NONHSAT044053.2	1.9189	0.387612	4.95057	2,30759410811674	0.000587583
NONHSAT061481.2	0.988951	0.199817	4.94929	2,30722075460964	0.00309364
ENST00000510859	2.33494	0.472074	4.94613	2,30630043211846	0.00297407
NONHSAT084499.2	1.8442	0.373075	4.94324	2,30545627281232	0.00286519
NONHSAT185053.1	1.73237	0.350988	4.93568	2,30324888300153	0.00194907
ENST00000478845	245.775	49.9997	4.91553	2,29734629431125	0.000224885
NONHSAT167187.1	0.0491466	0.01	4.91466	2,2970909199841	0.000428911
NONHSAT141018.2	5.01133	1.02783	4.87563	2,28559004002259	0.00562768
NONHSAT173477.1	6.22878	1.27754	4.87559	2,28557660121461	0.00228832
NONHSAT130993.2	4.0816	0.837158	4.87554	2,2855631609288	0.00320777
NONHSAT125654.2	1.56391	0.320767	4.87553	2,28556046888919	0.00437172
NONHSAT005569.2	5.8598	1.20188	4.87551	2,28555271043316	0.00491841
NONHSAT086997.2	3.86486	0.792709	4.87551	2,28555271043315	0.00491841
NONHSAT163493.1	5.18597	1.06369	4.87547	2,28554264258382	0.00462819
NONHSAT090274.2	3.38465	0.696351	4.86055	2,28111963798661	0.000335703
ENST00000557108	6.08093	1.2571	4.83727	2,27419382368362	0.000598598
NONHSAT186073.1	6.42493	1.32886	4.83492	2,27349147763483	0.00143567
NONHSAT130037.2	3.23877	0.670868	4.82773	2,27134514316341	0.00169588
NONHSAT192145.1	1.40305	0.290807	4.82467	2,27043080068593	0.00192549
ENST00000623230	13.0856	2.7128	4.82363	2,27011945095661	0.000590737
ENST00000606809	3.27231	0.680629	4.80777	2,26536918450528	0.00359258
NONHSAT171125.1	38.8244	8.08173	4.80397	2,26422851494009	0.000428617
NONHSAT208885.1	3.47058	0.722798	4.80159	2,26351345361275	0.00444929
NONHSAT216477.1	0.0479747	0.01	4.79747	2,26227272413023	0.00292486
NONHSAT223564.1	1.76436	0.368012	4.7943	2,26132066982694	0.00498163
ENST00000419844	15.0335	3.14169	4.78515	2,25856424328508	0.00566421
NONHSAT107814.2	1.05141	0.219971	4.77977	2,25694040366684	0.00608101
NONHSAT099611.2	26.7438	5.59755	4.77776	2,25633589484673	0.000527865
ENST00000488192	5.67821	1.18865	4.77702	2,25610964520695	0.00206283
NONHSAT002182.2	7.34225	1.5385	4.77234	2,25469640028787	0.000877761
NONHSAT088826.2	11.0605	2.32391	4.75944	2,25079170257594	0.00259053
NONHSAT172879.1	5.50578	1.15897	4.75059	2,24810559390987	0.00276567
NONHSAT169495.1	0.417385	0.087953	4.74554	2,24657333533618	0.00286519
NONHSAT011407.2	11.3556	2.39516	4.74103	2,245202033078	0.000529357
MSTRG.46130.2	20.4573	4.31575	4.74014	2,24492949320086	0.00193734
ENST00000623825	2.0804	0.438895	4.74008	2,24491157386064	0.00402493
ENST00000558757	10.2389	2.16368	4.73216	2,24249963815799	0.00220259
NONHSAT090279.2	1.40839	0.297897	4.72778	2,24116415451619	0.00225618
NONHSAT141592.2	2.47705	0.524703	4.72086	2,23904912382729	0.00533237
NONHSAT193043.1	1.12303	0.238281	4.71304	2,2366573584459	0.00244159
NONHSAT144362.2	0.967243	0.205805	4.69981	2,23260096962171	0.00206143
NONHSAT213339.1	1.15396	0.245533	4.69981	2,23260096962171	0.00206143
ENST00000547580	36.6326	7.80738	4.69204	2,23021651537452	0.00102909
NONHSAT002908.2	6.29112	1.3441	4.68056	2,22668022345266	0.00320777
NONHSAT054034.2	5.10575	1.09084	4.68056	2,22668022345265	0.00320777
NONHSAT150381.1	4.1805	0.90234	4.63296	2,21193351268627	0.00111363
NONHSAT149275.1	0.678876	0.146894	4.62154	2,20837225847642	0.00278268
NONHSAT144350.2	0.798913	0.1735	4.60469	2,203104954718	0.00505698
NONHSAT150378.1	3.19296	0.696567	4.58385	2,19656106794083	0.00250385
NONHSAT168531.1	0.72964	0.159309	4.58003	2,19535829658621	0.00295604
NONHSAT030431.2	8.26642	1.80687	4.57498	2,1937670074185	0.000776341
NONHSAT155168.1	52.6192	11.5208	4.56731	2,19134431208912	0.000698185
NONHSAT181722.1	0.843032	0.184799	4.56188	2,18962918978824	0.00164261
NONHSAT149636.1	0.0455142	0.01	4.55142	2,18631733895382	0.000428911
NONHSAT184808.1	0.760295	0.167579	4.53692	2,18171430763103	0.00567107
NONHSAT155114.1	8.61735	1.89962	4.53636	2,1815364879067	0.000992347
NONHSAT207804.1	7.11775	1.57007	4.5334	2,18059204023738	0.00278117
ENST00000534123	1.02664	0.227707	4.50862	2,17268661675235	0.00347386
NONHSAT153258.1	3.86573	0.858944	4.50057	2,17010661969042	0.00429264
ENST00000456516	6.68479	1.48532	4.50057	2,17010661969041	0.00429264
ENST00000553465	11.8092	2.62396	4.50052	2,17009221389453	0.00152545
NONHSAT196181.1	2.47918	0.551376	4.49636	2,16875619825442	0.00360878
NONHSAT076209.2	8.96227	1.99804	4.48552	2,16527675627373	0.0045108
NONHSAT151865.1	0.987616	0.220977	4.46931	2,16005223508591	0.00348403
NONHSAT077379.2	3.42211	0.765711	4.4692	2,16001499662502	0.004348
NONHSAT168651.1	10.1919	2.28577	4.45883	2,15666642193834	0.00316976
NONHSAT199041.1	25.0474	5.62486	4.45298	2,15477134407368	0.00102748
NONHSAT024367.2	11.573	2.59978	4.45152	2,15429733867341	0.00235579
ENST00000537616	12.0898	2.72577	4.43537	2,14905449054259	0.00106648
NONHSAT056017.2	15.2443	3.44013	4.43132	2,14773605820803	0.00107703
NONHSAT041505.2	6.5752	1.48471	4.42862	2,14685592476771	0.00332644
NONHSAT210018.1	3.39668	0.767762	4.42413	2,14539381964994	0.00379166
NONHSAT217433.1	15.661	3.54284	4.42046	2,14419690678326	0.00175326
ENST00000624925	1.59904	0.36362	4.39757	2,13670585974352	0.00408495
NONHSAT001736.2	3.59774	0.819083	4.3924	2,13500806021059	0.00185401
NONHSAT152294.1	5.29428	1.2079	4.38305	2,1319358400171	0.00425121
NONHSAT155687.1	9.77243	2.23488	4.37268	2,12851672507834	0.00104354
NONHSAT039746.2	4.07166	0.931488	4.37114	2,12800822577991	0.00509182
NONHSAT185335.1	3.16058	0.723885	4.36614	2,12635928253447	0.00201852
NONHSAT168942.1	11.1316	2.55082	4.36392	2,12562497614825	0.00259235
ENST00000565113	2.11839	0.486224	4.35682	2,12327641056759	0.00283201
NONHSAT181487.1	18.7973	4.31577	4.35548	2,12283137015489	0.00567107
NONHSAT101980.2	2.42114	0.556182	4.35315	2,12205943770519	0.00535914
NONHSAT160863.1	10.1055	2.32503	4.34639	2,11981710772094	0.0031396
NONHSAT123391.2	11.2859	2.61184	4.32104	2,11137771605053	0.00182065
NONHSAT039831.2	4.67432	1.08281	4.31686	2,10998211096742	0.00486868
NONHSAT091384.2	4.32423	1.00363	4.30861	2,10722113171026	0.00338121
MSTRG.10748.1	11.1127	2.5818	4.30426	2,10576546411841	0.00135491
ENST00000609281	8.19812	1.90568	4.30195	2,10498959631556	0.0048824
NONHSAT074755.2	4.46596	1.04234	4.28453	2,09913819606438	0.0051046
ENST00000600255	63.3888	14.9331	4.24485	2,08571524948768	0.00144096
ENST00000343999	2.71244	0.640629	4.23402	2,08202897439525	0.00531651
ENST00000606664	3.25706	0.769586	4.23223	2,08141652897251	0.00362069
NONHSAT220516.1	13.5906	3.21636	4.22547	2,07911165967869	0.00365958
NONHSAT095816.2	6.33087	1.49828	4.22542	2,07909500124146	0.00272248
NONHSAT158743.1	8.06297	1.91171	4.21768	2,07644816564978	0.00490887
NONHSAT003132.2	5.18877	1.23118	4.21445	2,07534524159049	0.00349621
NONHSAT015462.2	10.505	2.49438	4.21148	2,07432774140041	0.0022826
NONHSAT211638.1	5.0095	1.19389	4.19594	2,06899408411141	0.00363475
NONHSAT212195.1	4.33171	1.03352	4.19122	2,06737055895929	0.00283573
NONHSAT174865.1	0.0578388	0.0138061	4.18935	2,06672772126538	0.00425345
ENST00000398460	14.4634	3.45315	4.18847	2,06642161916403	0.00151515
ENST00000614046	5.1564	1.23125	4.18795	2,0662449940729	0.00393605
ENST00000530198	10.4501	2.53101	4.12884	2,04573625998237	0.00336724
NONHSAT182034.1	0.549839	0.133626	4.11478	2,04081425037561	0.00458337
ENST00000624694	11.1652	2.71515	4.11217	2,03989910372516	0.00359029
NONHSAT025074.2	5.62773	1.38513	4.06297	2,02253451427594	0.00327513
NONHSAT215595.1	1.78364	0.439	4.06297	2,02253359149637	0.00507589
NONHSAT186250.1	12.8455	3.16162	4.06295	2,02252875302865	0.00395925
NONHSAT192346.1	7.72876	1.90228	4.0629	2,02250947013793	0.00546127
NONHSAT222699.1	39.8506	9.84595	4.04741	2,01700005987757	0.00206831
ENST00000606034	4.69727	1.16068	4.04699	2,016849989115	0.00523906
NONHSAT185724.1	7.87355	1.94716	4.04361	2,0156426520097	0.00341421
NONHSAT071979.2	2.65807	0.658475	4.03671	2,01317955382697	0.00415807
MSTRG.38456.1	3.84475	0.954248	4.02909	2,01045309851553	0.00354803
NONHSAT182121.1	1.30626	0.324455	4.026	2,00934653651107	0.00590168
NONHSAT123657.2	5.05483	1.25683	4.0219	2,00787729789872	0.00244347
ENST00000561463	0.933448	0.233534	3.99706	1,99893959677714	0.0044493
ENST00000623440	1.38204	0.345802	3.99661	1,99877699151573	0.00336923
NONHSAT196001.1	8.55551	2.14357	3.99124	1,99683843110777	0.00465272
NONHSAT190705.1	8.07063	2.02694	3.98168	1,99337904610738	0.00307979
NONHSAT092952.2	7.16699	1.80543	3.96967	1,98902071181084	0.00578272
NONHSAT164153.1	3.45139	0.876146	3.93928	1,97793340571922	0.00441315
ENST00000587762	22.137	5.6198	3.93911	1,97787083062953	0.0028862
NONHSAT189760.1	7.47961	1.91066	3.91467	1,96888978187683	0.00353369
NONHSAT099144.2	33.4681	8.58397	3.8989	1,96306792532432	0.0028017
NONHSAT052329.2	10.6116	2.7329	3.8829	1,95713413506994	0.00366596
NONHSAT168956.1	5.18375	1.3352	3.88236	1,95693477496275	0.00368085
ENST00000618256	3.40045	0.876528	3.87946	1,95585416463415	0.00611096
NONHSAT081532.2	10.2114	2.65961	3.83945	1,94090001121187	0.00544388
NONHSAT123380.2	12.8663	3.35142	3.83907	1,94075855291749	0.00299365
NONHSAT182102.1	59.2497	15.534	3.81419	1,93137567841922	0.00405036
NONHSAT037121.2	22.3703	5.87947	3.80482	1,92782923482395	0.00387775
NONHSAT013600.2	12.7929	3.38809	3.77585	1,91680274963483	0.00478308
NONHSAT157440.1	13.0376	3.52938	3.69402	1,88519216893747	0.00485109
NONHSAT052944.2	3.42357	0.934461	3.66369	1,87329581820349	0.00599937
ENST00000567795	1.86771	3.74023	0.499358	-1,00185452341634	0.00283947
NONHSAT075991.2	1.24636	2.49862	0.498817	-1,00341614821971	0.00557246
ENST00000530248	2.10887	4.23568	0.497883	-1,00612075305357	0.00295508
NONHSAT094172.2	0.787875	1.5827	0.497805	-1,00634695799976	0.00247866
ENST00000425932	1.71677	3.44869	0.497805	-1,00634695799976	0.00490008
NONHSAT022822.2	7.02386	14.1138	0.497659	-1,00677193263068	0.00263445
NONHSAT135603.2	0.728577	1.46858	0.49611	-1,01126767404524	0.00292332
NONHSAT084854.2	2.03987	4.14681	0.491913	-1,02352358532873	0.00204811
NONHSAT204093.1	1.32593	2.70259	0.490615	-1,02733558460009	0.00489262
ENST00000444263	6.17759	12.6165	0.489643	-1,03019856064156	0.00299127
NONHSAT185473.1	3.02229	6.19898	0.487547	-1,03638734005656	0.00359406
NONHSAT196542.1	3.42104	7.03519	0.486275	-1,04015539471764	0.00338121
NONHSAT004613.2	1.04359	2.15044	0.48529	-1,0430799083277	0.00329616
NONHSAT070712.2	0.681151	1.40462	0.484936	-1,04413493521406	0.00322982
NONHSAT220595.1	0.605451	1.26865	0.47724	-1,06721425431709	0.00299473
ENST00000415992	0.672644	1.40945	0.47724	-1,06721425431709	0.00299473
MSTRG.29835.1	2.00636	4.21491	0.476016	-1,0709185286292	0.00124592
ENST00000453324	1.76935	3.72795	0.474619	-1,07515966632002	0.0033714
MSTRG.7959.1	2.60597	5.49392	0.474338	-1,07601228088399	0.00178489
NONHSAT181514.1	5.7713	12.1696	0.47424	-1,07631175069308	0.000894702
ENST00000522190	4.57688	9.6557	0.474008	-1,07701652102672	0.00276625
NONHSAT102609.2	2.4867	5.26196	0.47258	-1,08136885499054	0.00064504
NONHSAT159592.1	1.63049	3.46592	0.470436	-1,08792861780409	0.00505698
NONHSAT037718.2	0.680442	1.44934	0.469484	-1,09085249646124	0.00485048
NONHSAT076526.2	6.27327	13.41	0.467806	-1,09601637765812	0.000822042
NONHSAT074905.2	0.819657	1.75424	0.467245	-1,09775039694362	0.00565647
ENST00000414046	2.90269	6.21553	0.467006	-1,09848748086521	0.00103054
NONHSAT196558.1	1.32854	2.84602	0.466808	-1,09909893957603	0.00420727
NONHSAT091534.2	0.351528	0.76277	0.460857	-1,11760781100011	0.00533237
NONHSAT220409.1	2.65439	5.7709	0.459962	-1,12041474095893	0.0031309
ENST00000529089	5.71327	12.4393	0.45929	-1,12252252214481	0.000778568
NONHSAT041009.2	0.766488	1.67214	0.458388	-1,1253596941111	0.00179934
ENST00000526720	8.08146	17.6376	0.458196	-1,12596297389717	0.00119274
NONHSAT027287.2	6.60321	14.4499	0.456973	-1,12981826874269	0.00047708
NONHSAT198635.1	7.43298	16.2737	0.456748	-1,13052848703587	0.00072239
NONHSAT097978.2	2.47241	5.41407	0.456664	-1,13079356044171	0.00218749
NONHSAT107064.2	2.60597	5.73166	0.454662	-1,13713506173801	0.000835259
NONHSAT007810.2	4.97755	10.9983	0.452575	-1,14377153792149	0.00359258
NONHSAT169441.1	7.66569	16.9671	0.451799	-1,1462484082373	0.000591911
NONHSAT041962.2	0.959631	2.12569	0.451443	-1,14738280285554	0.00444929
NONHSAT183324.1	18.8749	41.8598	0.450907	-1,14909718867683	0.000428071
NONHSAT114451.2	6.06448	13.4751	0.45005	-1,15184132433693	0.00085626
NONHSAT022129.2	1.05255	2.34092	0.449633	-1,1531804979013	0.0007857
ENST00000624094	37.5337	83.6274	0.44882	-1,15579034184127	0.000331702
NONHSAT158780.1	0.574021	1.27947	0.448639	-1,15637446407011	0.000691012
ENST00000525331	15.9899	35.6995	0.447903	-1,15874159096797	0.000491706
ENST00000607386	1.83834	4.11326	0.446931	-1,16187748403925	0.00190043
ENST00000426023	2.13327	4.79313	0.445069	-1,16789955207822	0.000863063
ENST00000518014	5.54854	12.4814	0.444544	-1,16960307476406	0.000358017
NONHSAT094599.2	2.02468	4.55918	0.444089	-1,17107989330166	0.000645895
NONHSAT066232.2	11.0218	24.8246	0.443989	-1,17140290732464	0.000982995
NONHSAT010755.2	1.35924	3.06668	0.443229	-1,17387736212737	0.00334225
NONHSAT074176.2	5.17546	11.7001	0.442343	-1,17676185302581	0.000385662
NONHSAT018059.2	10.4627	23.715	0.441184	-1,18054789337749	0.000347998
NONHSAT099520.2	0.168627	0.382283	0.441104	-1,18080851478309	0.00414379
NONHSAT166471.1	1.33338	3.02723	0.440463	-1,1829073108252	0.00225618
NONHSAT169641.1	1.61509	3.66948	0.440142	-1,18395831701138	0.00269106
NONHSAT179733.1	52.3244	119.013	0.439654	-1,18555890715176	0.000277616
ENST00000609143	0.919834	2.09241	0.439605	-1,18571981961912	0.00161613
NONHSAT066326.2	1.34387	3.06439	0.438543	-1,18920990816864	0.00462819
NONHSAT200823.1	0.762124	1.73785	0.438543	-1,18920990816864	0.00462819
NONHSAT041034.2	0.708756	1.61984	0.437547	-1,19248960323405	0.00297407
NONHSAT152280.1	6.38167	14.5996	0.437114	-1,19391986910745	0.000626601
NONHSAT107073.2	4.50774	10.3482	0.435606	-1,19890588745991	0.00244159
NONHSAT047823.2	0.784183	1.80556	0.434316	-1,20318433913538	0.0016678
NONHSAT041004.2	0.658594	1.51965	0.433386	-1,20627434160003	0.00126999
NONHSAT196554.1	1.06603	2.45979	0.433381	-1,20629351924221	0.00287155
NONHSAT179503.1	8.36095	19.3412	0.432288	-1,20993693425241	0.000343906
ENST00000564623	0.69973	1.61928	0.432125	-1,2104799132671	0.000949861
NONHSAT098755.2	0.383065	0.887358	0.431692	-1,21192582483435	0.00404284
ENST00000558334	2.04774	4.7555	0.430604	-1,21556578209314	0.0015325
NONHSAT184707.1	0.622197	1.44633	0.430189	-1,21695642347804	0.00114582
NONHSAT036752.2	2537.4	5932.7	0.427696	-1,2253416092156	0.000188179
NONHSAT106529.2	0.169862	0.397184	0.427666	-1,22544191892469	0.00524887
NONHSAT080661.2	0.375397	0.879963	0.426606	-1,22902499023044	0.00235762
ENST00000623323	1.19167	2.80143	0.425379	-1,23318079247932	0.000909671
NONHSAT036725.2	1.50354	3.54204	0.424485	-1,23621591822929	0.00106916
NONHSAT000464.2	1.54618	3.64696	0.423964	-1,23798581909452	0.00142627
ENST00000569981	0.567066	1.33756	0.423956	-1,23801418933697	0.0033712
ENST00000584934	0.989134	2.33311	0.423956	-1,23801418933698	0.0033712
ENST00000614517	18.562	43.8299	0.423502	-1,23956021097776	0.000176524
NONHSAT159295.1	4.2421	10.0168	0.423498	-1,23957298717449	0.000435613
NONHSAT015621.2	4.44662	10.5124	0.422988	-1,24131039218656	0.000556637
NONHSAT114779.2	0.274405	0.648742	0.42298	-1,241338695031	0.00284744
NONHSAT219628.1	2.18964	5.1859	0.422229	-1,24390295894136	0.000330938
NONHSAT075176.2	23.4706	55.7702	0.420844	-1,24864293267653	0.000240486
NONHSAT114865.2	0.633081	1.50628	0.420294	-1,25052821682383	0.00453301
NONHSAT148519.1	0.99552	2.37036	0.419987	-1,2515848233158	0.000703062
NONHSAT208162.1	2.52451	6.01919	0.419411	-1,25356377580257	0.00371406
NONHSAT212134.1	5.15757	12.3056	0.419124	-1,25455074548076	0.000631123
NONHSAT115814.2	4.56922	10.9241	0.418268	-1,25750064428238	0.000271478
NONHSAT145657.2	0.403705	0.966043	0.417895	-1,25878744104211	0.00296242
NONHSAT216789.1	0.53288	1.27667	0.417399	-1,26049943400213	0.000664249
ENST00000566747	0.349683	0.838036	0.417265	-1,26096391924741	0.00251487
ENST00000623780	0.752725	1.80632	0.416718	-1,26285588506287	0.00215883
NONHSAT058605.2	0.577092	1.38948	0.415329	-1,26767360646861	0.00216515
NONHSAT074175.2	3.16272	7.62547	0.414757	-1,26966159896912	0.000235104
NONHSAT022133.2	0.712213	1.71873	0.414384	-1,27095819906487	0.000421201
NONHSAT010129.2	0.338513	0.817139	0.414267	-1,27136859748458	0.00606513
NONHSAT066716.2	0.875996	2.11457	0.414267	-1,27136859748458	0.00606513
NONHSAT022124.2	2.32923	5.62546	0.414051	-1,27211814697373	0.000159007
NONHSAT082500.2	0.671854	1.62278	0.414016	-1,272243202949	0.000395376
NONHSAT099254.2	0.260025	0.628561	0.413683	-1,2734029822528	0.00482876
NONHSAT159728.1	8.50507	20.5596	0.413679	-1,27341471124238	0.000452491
ENST00000427606	3.06182	7.40234	0.413629	-1,27359061325314	0.000223622
NONHSAT037120.2	3.3806	8.18446	0.413051	-1,27560974673883	0.000252262
NONHSAT157190.1	0.478854	1.16014	0.412755	-1,27664309490561	0.00322999
NONHSAT094270.2	0.463737	1.1264	0.411698	-1,2803429595929	0.00222213
NONHSAT145933.2	1.15501	2.8072	0.411444	-1,28123106432338	0.00191646
NONHSAT059294.2	0.777374	1.88938	0.411444	-1,28123106432338	0.00191646
NONHSAT079277.2	1.7127	4.16524	0.411189	-1,2821264171434	0.00166893
NONHSAT029235.2	0.836542	2.03559	0.410957	-1,28293991714553	0.00146617
ENST00000602964	10.5009	25.6194	0.40988	-1,28672707077531	0.000121911
NONHSAT183033.1	0.0192662	0.0472037	0.408151	-1,29282422597266	0.00040535
NONHSAT115734.2	1.56308	3.83217	0.407884	-1,29376894874857	0.000352795
NONHSAT108160.2	2.52451	6.21332	0.406307	-1,29935901157131	0.00281053
NONHSAT175195.1	0.502513	1.2368	0.406301	-1,2993776222355	0.0051673
NONHSAT121106.2	0.599173	1.4747	0.406301	-1,29937762223551	0.0051673
NONHSAT204011.1	0.928452	2.28515	0.406298	-1,29939127205925	0.00170203
ENST00000607036	1.76768	4.35069	0.406297	-1,29939222359085	0.00236548
NONHSAT108559.2	0.362125	0.89128	0.406297	-1,29939222359085	0.00236548
NONHSAT135552.2	0.619563	1.5249	0.406297	-1,29939222359085	0.00236548
NONHSAT121213.2	0.464378	1.14297	0.40629	-1,29941662201227	0.00414572
NONHSAT088941.2	0.575769	1.41714	0.40629	-1,29941662201228	0.00414572
NONHSAT208221.1	0.730703	1.79854	0.406276	-1,29946655913033	0.00555757
ENST00000623493	2.96207	7.34749	0.403141	-1,3106446499347	0.000323017
NONHSAT026062.2	0.940357	2.3408	0.401724	-1,31572385370998	0.00131301
ENST00000599439	0.867353	2.16022	0.401511	-1,31648688281894	0.00132831
NONHSAT157119.1	4.01846	10.014	0.401283	-1,31730979532192	0.00151226
NONHSAT140844.2	1.82251	4.54323	0.401148	-1,31779406146104	0.000488052
NONHSAT203660.1	2.29761	5.7296	0.401006	-1,31830366073198	0.00173729
NONHSAT123298.2	0.438118	1.09451	0.400286	-1,32089603458721	0.000384821
NONHSAT039628.2	0.67756	1.6955	0.399622	-1,32329258187536	0.00292963
ENST00000568177	0.284832	0.712753	0.399622	-1,32329258187536	0.00292963
NONHSAT092855.2	3.06764	7.6796	0.399453	-1,32390089027412	0.000238277
NONHSAT209688.1	0.797154	1.99706	0.399164	-1,32494686381947	0.00356148
ENST00000310916	0.597668	1.49777	0.399039	-1,32539769038324	0.000314602
NONHSAT007806.2	1.65241	4.14516	0.398637	-1,32685320916052	0.0044052
NONHSAT208214.1	1.92875	4.84627	0.397987	-1,3292084170357	0.0047013
ENST00000625052	2.01322	5.06436	0.397527	-1,33087400403025	0.000579733
NONHSAT056570.2	0.463249	1.16611	0.397261	-1,33184061976359	0.00601101
NONHSAT169506.1	2.93915	7.40365	0.396987	-1,33283627331967	0.000669374
NONHSAT074910.2	1.00265	2.5328	0.395866	-1,33691590183867	0.00153719
NONHSAT166507.1	0.341738	0.864155	0.39546	-1,33839776665333	0.00021201
NONHSAT170529.1	0.333659	0.84538	0.394686	-1,34122324115492	0.0020715
NONHSAT108734.2	0.554499	1.41218	0.392655	-1,34866490412031	0.000472663
NONHSAT188651.1	0.996442	2.54011	0.392283	-1,35003316171861	0.00105897
NONHSAT007031.2	0.988737	2.5233	0.391843	-1,35165155464692	0.000248534
NONHSAT144205.2	0.469137	1.19905	0.391256	-1,35381529796846	0.00375801
ENST00000607434	1.21587	3.11358	0.390504	-1,35659097734921	0.0002046
ENST00000610494	1.27656	3.27109	0.390256	-1,35750732523344	0.000181581
NONHSAT037719.2	1.1602	2.97456	0.390043	-1,3582951791518	0.00103975
NONHSAT155530.1	2.58611	6.63046	0.390036	-1,35832188585192	0.00156347
NONHSAT217083.1	0.282891	0.727938	0.388619	-1,36357191747467	0.00504141
ENST00000455249	3.02345	7.78595	0.388321	-1,36467714689618	0.000778843
ENST00000594564	2.76172	7.11577	0.388112	-1,3654557241089	0.00185785
NONHSAT209325.1	3.02556	7.80492	0.387647	-1,36718359339153	0.000853095
NONHSAT076132.2	1.49652	3.87089	0.386609	-1,37105119857082	0.00022873
NONHSAT138819.2	6.74438	17.5299	0.384736	-1,37806069996407	8.10604e-05
NONHSAT078003.2	0.165897	0.431863	0.384144	-1,3802827308409	0.0032081
NONHSAT106610.2	3.30656	8.62275	0.383469	-1,38281709828305	0.000946133
NONHSAT193905.1	0.8894	2.3258	0.382405	-1,38682541032782	0.00162027
NONHSAT107098.2	1.92026	5.02169	0.382392	-1,38687404233808	0.000598636
NONHSAT102640.2	1.35139	3.55299	0.380352	-1,39459284558048	0.00423158
NONHSAT150325.1	14.0278	36.8898	0.380263	-1,39493050520706	7.90443e-05
NONHSAT022137.2	0.494569	1.30328	0.37948	-1,39790354294317	0.000244186
NONHSAT003386.2	0.470036	1.23952	0.379209	-1,39893386433666	0.00226673
ENST00000440052	0.306598	0.808518	0.379209	-1,39893386433666	0.00226673
NONHSAT053385.2	1.59491	4.2117	0.378685	-1,40093162513081	0.000771475
ENST00000449419	1.62773	4.3067	0.377952	-1,40372380629355	0.000842996
NONHSAT087297.2	2.27958	6.04216	0.377279	-1,40629637060037	0.0027406
NONHSAT053437.2	2.05246	5.45345	0.37636	-1,40981325769425	0.000248844
NONHSAT034769.2	0.418065	1.11084	0.376349	-1,40985671269144	0.000682931
ENST00000420084	2.21568	5.89162	0.376073	-1,41091503618643	0.000502175
NONHSAT200085.1	2.04112	5.44233	0.375046	-1,41486228667895	0.000436045
NONHSAT191606.1	0.118967	0.317225	0.375023	-1,41494791175102	0.00337164
NONHSAT131128.2	1.4407	3.84922	0.374284	-1,41779464613596	0.000259615
NONHSAT176578.1	1.56426	4.19161	0.37319	-1,42201960015741	0.000376717
NONHSAT207281.1	0.39994	1.07387	0.372429	-1,42496077573249	0.00355477
NONHSAT034263.2	1.57201	4.22228	0.372312	-1,42541545889714	0.000138775
NONHSAT212737.1	24.2034	65.0174	0.37226	-1,42561582199473	4.87517e-05
NONHSAT021545.2	1.32306	3.5579	0.371866	-1,42714650722121	0.000145629
ENST00000624818	1.62228	4.36434	0.371712	-1,427742614782	0.000229451
ENST00000495723	1.03375	2.78898	0.370655	-1,4318519770684	0.000153438
NONHSAT016968.2	1.2616	3.40379	0.370645	-1,43188865980413	0.000535233
NONHSAT137340.2	0.530257	1.432	0.370291	-1,43327000735819	0.000946215
NONHSAT131323.2	0.239535	0.648507	0.369364	-1,4368845329798	0.00451877
NONHSAT195845.1	0.998214	2.71279	0.367966	-1,44235627933806	0.000574155
NONHSAT119942.2	1.88283	5.12879	0.36711	-1,44571670014498	7.72091e-05
NONHSAT094427.2	1.05483	2.8744	0.366974	-1,44625206481033	0.00168283
NONHSAT144590.2	0.336604	0.920475	0.365686	-1,45132446545381	0.00589328
NONHSAT151947.1	0.463871	1.2685	0.365686	-1,45132446545381	0.00589328
ENST00000461448	0.520977	1.428	0.36483	-1,45470263363787	0.00298876
NONHSAT029233.2	0.650291	1.78727	0.363845	-1,45860321818668	0.000168813
NONHSAT204986.1	0.68155	1.87323	0.363836	-1,45863906822186	0.00124396
NONHSAT094063.2	0.415379	1.14347	0.363263	-1,46091318142356	0.000661554
ENST00000562242	1.64581	4.54177	0.362372	-1,46445509625092	6.41316e-05
ENST00000599781	0.693142	1.91921	0.36116	-1,46929073274013	0.00107862
ENST00000586907	1.09129	3.02165	0.361157	-1,46930014616547	0.00376055
NONHSAT001157.2	1.06518	2.94936	0.361155	-1,46930970312714	0.000288944
ENST00000506606	1.31296	3.63549	0.36115	-1,46933070836565	0.000172958
NONHSAT022220.2	1.15895	3.20906	0.36115	-1,46933138391336	0.00145149
NONHSAT098194.2	0.251007	0.696823	0.360216	-1,47306497805507	0.000159923
ENST00000609111	0.383535	1.06822	0.35904	-1,47778382306935	0.000587639
NONHSAT033727.2	0.351734	0.980286	0.358807	-1,4787183871038	0.000830771
NONHSAT081962.2	0.719249	2.00635	0.358487	-1,48000875444078	0.00108089
NONHSAT217804.1	1.44087	4.03001	0.357535	-1,48384371320863	0.00298876
ENST00000546413	0.525754	1.47193	0.357186	-1,48525303235561	0.000532553
NONHSAT006664.2	0.68602	1.92765	0.355884	-1,49052228254921	0.000245519
NONHSAT165291.1	0.173348	0.487192	0.355812	-1,49081473652649	0.000156602
ENST00000564700	2.73905	7.72498	0.354571	-1,4958530203564	0.00205977
ENST00000623937	0.558047	1.57387	0.354571	-1,4958530203564	0.00205977
ENST00000564650	1.07526	3.03257	0.354571	-1,4958530203564	0.00205977
NONHSAT148237.1	4.03619	11.4147	0.353594	-1,49983272487649	9.22725e-05
NONHSAT207074.1	0.91199	2.58134	0.353301	-1,50103144387656	0.00313252
NONHSAT200062.1	0.110752	0.314535	0.352114	-1,50588641189875	0.000309004
NONHSAT168677.1	0.429198	1.22194	0.351243	-1,50945947399074	1.83904e-05
ENST00000414890	1.15152	3.28519	0.35052	-1,51243310360226	0.00251507
NONHSAT208611.1	1.67205	4.77677	0.350038	-1,51441769812142	0.000122021
NONHSAT152405.1	2.45711	7.04116	0.348963	-1,518854409451	0.000146188
NONHSAT137587.2	0.148633	0.426779	0.348268	-1,52173222457174	0.0039925
NONHSAT076130.2	3.4188	9.8359	0.347584	-1,52456480760791	0.000119346
NONHSAT148836.1	3.90853	11.2672	0.346894	-1,52743279823479	4.69119e-05
ENST00000380334	0.976651	2.81689	0.346712	-1,52819087270169	0.000721991
ENST00000623428	0.930441	2.68638	0.346355	-1,52967727535824	0.00126089
ENST00000570130	0.857742	2.47654	0.346347	-1,52971158981726	0.000105719
NONHSAT191049.1	2.8276	8.20232	0.344732	-1,53645302671818	0.000935385
ENST00000514376	0.614766	1.78332	0.344732	-1,53645302671818	0.000935385
NONHSAT126845.2	0.177831	0.515852	0.344732	-1,53645302671818	0.000935385
NONHSAT132961.2	0.30649	0.89153	0.34378	-1,54044212835318	0.00211837
NONHSAT161875.1	0.339469	0.987459	0.34378	-1,54044212835318	0.00211837
NONHSAT029263.2	0.157541	0.45826	0.34378	-1,54044212835318	0.00211837
NONHSAT091143.2	2.37098	6.90027	0.343607	-1,54117011011432	4.80384e-05
NONHSAT022221.2	0.99422	2.89575	0.343338	-1,54229998066309	0.000817713
NONHSAT057058.2	0.156016	0.456019	0.342127	-1,54739690192307	0.00522805
NONHSAT144744.2	0.173031	0.50575	0.342127	-1,54739690192308	0.00522805
ENST00000563635	2.11201	6.18724	0.341349	-1,55068194524366	2.86251e-05
ENST00000605631	1.58181	4.65006	0.34017	-1,55567312702419	0.0032913
ENST00000562459	2.12242	6.23956	0.340156	-1,55573287460836	5.49071e-05
NONHSAT099672.2	1.0858	3.19215	0.340149	-1,55576274932835	0.000401004
ENST00000619486	0.79186	2.33027	0.339815	-1,55717761723441	0.00031174
ENST00000432120	1.31577	3.90095	0.337295	-1,5679177152782	0.00178586
NONHSAT171406.1	0.0807647	0.240185	0.336261	-1,57234876427807	0.00525705
NONHSAT089299.2	0.0767352	0.228202	0.336261	-1,57234876427807	0.00525705
NONHSAT199777.1	1.3303	3.95615	0.336261	-1,57234876427808	0.00525705
NONHSAT108565.2	1.90124	5.66063	0.335871	-1,57402173790914	4.28496e-05
NONHSAT208775.1	4.00585	11.9301	0.335777	-1,57442298699743	5.44548e-05
NONHSAT175932.1	2.66422	7.94142	0.335484	-1,57568376306076	2.08769e-05
NONHSAT173322.1	0.222475	0.663921	0.335093	-1,5773678725829	0.000271174
NONHSAT002171.2	1.17025	3.49752	0.334595	-1,57951369933557	0.000700406
NONHSAT123215.2	3.5531	10.6191	0.334594	-1,57951607100148	2.25137e-05
NONHSAT124385.2	0.419038	1.25694	0.333379	-1,58476381494745	0.000485983
NONHSAT099909.2	0.666523	1.99943	0.333356	-1,58486464277997	0.0042545
NONHSAT222463.1	0.221219	0.663611	0.333356	-1,58486464277997	0.0042545
NONHSAT148075.2	4.4684	13.4564	0.332064	-1,59046485289709	1.22035e-05
NONHSAT208612.1	1.6848	5.07625	0.331899	-1,59118566072768	0.000123611
NONHSAT196174.1	1.88624	5.69088	0.33145	-1,59313554051509	0.000107046
NONHSAT113507.2	0.802933	2.42535	0.331059	-1,59483888233942	8.73259e-05
NONHSAT180237.1	6.55326	19.839	0.330322	-1,59805540370279	2.92336e-05
NONHSAT180573.1	1.68459	5.11364	0.329431	-1,60195011923074	0.000110395
ENST00000429734	1.53585	4.66953	0.328908	-1,60424228764962	0.000342598
NONHSAT213773.1	2.11579	6.44893	0.328084	-1,60786225565788	5.57864e-05
NONHSAT195287.1	1.01989	3.12203	0.326673	-1,61407945042339	6.15456e-05
NONHSAT008997.2	0.132915	0.408902	0.325054	-1,62124946689612	0.00408795
NONHSAT208920.1	0.150257	0.462254	0.325054	-1,62124946689612	0.00408795
NONHSAT213227.1	0.344196	1.05889	0.325054	-1,62124946689612	0.00408795
NONHSAT011163.2	0.0742253	0.228348	0.325054	-1,62124946689612	0.00408795
ENST00000444762	1.45181	4.46659	0.325037	-1,62132628567311	0.00566802
NONHSAT148213.1	0.33379	1.02693	0.325037	-1,62132628567311	0.00566802
NONHSAT152370.1	0.526646	1.62027	0.325036	-1,62132743467972	0.000165399
NONHSAT168350.1	0.222224	0.683698	0.325032	-1,62134723695857	0.0012728
NONHSAT145635.2	1.01273	3.11583	0.325029	-1,62135896594815	0.000157302
ENST00000542475	0.351481	1.0814	0.325024	-1,62138390244026	0.00346637
NONHSAT216007.1	0.185019	0.572787	0.323015	-1,63032868175853	7.16708e-05
NONHSAT113450.2	1.04506	3.23994	0.322555	-1,63238492124482	3.12317e-05
ENST00000624344	4.2979	13.3255	0.322531	-1,63248988282879	1.4691e-05
ENST00000466953	4.07378	12.6785	0.321313	-1,63794829899445	7.49545e-06
NONHSAT145127.2	0.683489	2.12754	0.321257	-1,63819854944117	0.000267388
NONHSAT155528.1	1.86657	5.81939	0.32075	-1,64047941820353	0.000411879
NONHSAT202728.1	0.579796	1.80763	0.32075	-1,64047941820354	0.000411879
NONHSAT137584.2	1.09409	3.41255	0.320608	-1,64111947740592	8.95891e-05
ENST00000568997	0.762275	2.37871	0.320457	-1,64179583974689	9.20681e-05
NONHSAT073163.2	0.847802	2.65194	0.319692	-1,64524756487374	0.000786327
NONHSAT213611.1	1.44994	4.54192	0.319236	-1,64730431120949	6.08732e-05
NONHSAT005998.2	0.313146	0.981772	0.318959	-1,64855498912326	0.000148925
ENST00000603850	0.114807	0.362062	0.317091	-1,65703298647033	0.0028277
ENST00000576632	1.39323	4.39379	0.317091	-1,65703298647034	0.0028277
NONHSAT115433.2	0.175805	0.556327	0.316009	-1,66196110240766	0.00455058
NONHSAT199494.1	1.24444	3.94634	0.315339	-1,66502376170474	0.000509681
ENST00000461049	0.653875	2.07863	0.31457	-1,66854685781757	0.00408795
NONHSAT106569.2	0.944782	3.00341	0.31457	-1,66854685781757	0.00408795
NONHSAT099754.2	2.98662	9.49475	0.314555	-1,66861727819776	6.40244e-05
NONHSAT149867.1	1.75728	5.61243	0.313105	-1,67527929668572	0.000120811
NONHSAT022145.2	1.40856	4.50301	0.312804	-1,67666848504718	8.32484e-06
NONHSAT113138.2	1.12142	3.58813	0.312535	-1,67790955369035	1.88445e-05
NONHSAT169300.1	0.256772	0.8216	0.312527	-1,67794715906043	0.000314562
NONHSAT172814.1	0.372685	1.19256	0.312507	-1,67803817354245	0.005665
NONHSAT022504.2	3.32558	10.6611	0.311935	-1,68068405964628	1.00621e-05
NONHSAT200673.1	5.75615	18.4552	0.3119	-1,68084667843103	2.08964e-05
ENST00000512118	0.971419	3.1146	0.311892	-1,6808793253228	0.000147447
NONHSAT079340.2	1.20046	3.853	0.311566	-1,68239253529052	3.41469e-05
ENST00000504636	2.30198	7.40209	0.310991	-1,68505719163102	5.02742e-05
NONHSAT015757.2	1.59925	5.14632	0.310756	-1,68614636360687	1.41665e-05
NONHSAT151071.1	0.589254	1.90348	0.309567	-1,69167547438659	0.000223955
NONHSAT212686.1	0.454492	1.46827	0.309542	-1,69179166155818	0.00230963
NONHSAT129427.2	0.72783	2.35131	0.309542	-1,69179166155819	0.00230963
NONHSAT006790.2	0.225173	0.72744	0.309542	-1,69179166155819	0.00230963
ENST00000566968	0.415497	1.34563	0.308774	-1,69537615826962	0.000131829
ENST00000604992	0.452132	1.47051	0.307466	-1,70150012136396	0.000344236
NONHSAT052600.2	0.186167	0.605496	0.307463	-1,70151755627185	0.00365839
NONHSAT077581.2	0.522313	1.69879	0.307463	-1,70151755627185	0.00365839
NONHSAT171634.1	0.402138	1.30793	0.307463	-1,70151755627186	0.00365839
NONHSAT178263.1	0.658876	2.14869	0.306641	-1,70537724168009	0.00106891
NONHSAT200579.1	1.90687	6.22753	0.306201	-1,7074512137826	0.000379292
NONHSAT150616.1	0.433062	1.42112	0.304733	-1,71438306222413	0.00318492
NONHSAT179718.1	0.186445	0.611831	0.304733	-1,71438306222414	0.00318492
NONHSAT122631.2	0.930453	3.05358	0.304709	-1,71449733868267	0.000491613
NONHSAT198526.1	1.21026	3.98407	0.303776	-1,71892127095206	0.000101695
NONHSAT093181.2	1.70504	5.62042	0.303366	-1,72087056049238	5.21754e-05
NONHSAT125003.2	1.4679	4.84132	0.303201	-1,72165196392765	1.57814e-05
NONHSAT159267.1	0.466869	1.54416	0.302345	-1,72573256401064	0.00188891
ENST00000422847	0.285609	0.944645	0.302345	-1,72573256401065	0.00188891
ENST00000558671	0.183964	0.608458	0.302345	-1,72573256401065	0.00188891
NONHSAT178001.1	1.04338	3.45977	0.301576	-1,72940681561772	0.000123138
NONHSAT030038.2	0.356701	1.1852	0.300964	-1,73233933048802	0.000896839
ENST00000429067	0.188805	0.627416	0.300925	-1,73252455286403	0.00431262
ENST00000433644	0.274735	0.91297	0.300925	-1,73252455286403	0.00431262
NONHSAT098484.2	0.297401	0.988288	0.300925	-1,73252455286403	0.00431262
ENST00000606459	0.16674	0.556965	0.299373	-1,73998436309832	0.00294525
NONHSAT192268.1	0.270577	0.903813	0.299373	-1,73998436309832	0.00294525
NONHSAT030887.2	1.15154	3.8465	0.299373	-1,73998436309832	0.00294525
ENST00000464237	1.80024	6.01337	0.299373	-1,73998436309832	0.00294525
NONHSAT079354.2	0.464226	1.55199	0.299116	-1,74122378472487	3.48546e-05
NONHSAT199322.1	0.1505	0.505127	0.297946	-1,74687811904243	0.000555076
NONHSAT011080.2	0.965559	3.25719	0.29644	-1,75419036360806	6.05289e-06
ENST00000605740	0.300028	1.01532	0.2955	-1,75876862927764	0.00248625
NONHSAT220665.1	1.24696	4.21988	0.295495	-1,7587924628644	0.000135303
NONHSAT205011.1	0.157939	0.534506	0.295486	-1,75883986284852	0.000226793
ENST00000580655	0.595918	2.029	0.2937	-1,76758397296977	0.000162267
NONHSAT207202.1	0.442021	1.51093	0.292548	-1,77325256034117	0.000879111
ENST00000427063	3.69574	12.6362	0.292471	-1,77363211298099	4.62302e-06
[truncated: 2,204 more rows]
